# Supplementary material for: Loss of Planar Cell Polarity Effector Fuzzy Causes Renal Hypoplasia by Disrupting Several Signaling Pathways
Source: J Dev Biol. 2021 Dec 23;10(1):1. doi: 10.3390/jdb10010001 (PMC8788523; doi:10.3390/jdb10010001)
Supplement: Supplementary file 1 [file jdb-10-00001-s001.zip]

Archive with 6 entries (6 files):
- Supplementary File S1.pdf
- Supplementary File S2.pdf
- Supplementary File S3.xlsx
- Supplementary File S4.xlsx
- Supplementary File S5.pdf
- Supplementary File S6.xlsx
