# Supplementary material for: Loss of Planar Cell Polarity Effector Fuzzy Causes Renal Hypoplasia by Disrupting Several Signaling Pathways
Source: J Dev Biol. 2021 Dec 23;10(1):1. doi: 10.3390/jdb10010001 (PMC8788523; doi:10.3390/jdb10010001)
Supplement: Supplementary file 1 [file jdb-10-00001-s001.zip › Supplementary File S3.xlsx]

## Sheet: DESeq2-1807 DE genes
Up-Regulated Genes						Down-Regulated Genes
Gene_Symbol	log2FoldChange_WT_base	p_value				Gene_Symbol	log2FoldChange_WT_base	p_value
Gm11478	5.87017	1.58257e-142				Ftl1	-3.97578	6.58795e-59
Ftl1-ps2	6.6984	2.1902e-93				Gm2788	-3.70796	3.93572e-21
Ftl1-ps1	3.72988	5.37236e-64				Klk1	-4.2668	1.4181e-13
Gm6394	5.88145	2.47476e-57				Ccr1	-1.54423	5.39001e-11
Rps11-ps2	4.16686	3.65282e-36				Saa1	-3.60608	1.30625e-10
Slc6a16	4.01752	5.42421e-32				Myh11	-2.35729	5.83407e-10
Gm5452	6.86495	1.27735e-21				Cd33	-2.03229	5.92972e-09
Gm9247	5.37084	1.47552e-19				Ahsg	-2.86706	1.02237e-08
Gm15590	3.39828	5.43432e-19				Spta1	-1.49284	3.94326e-08
Gm11814	4.87769	6.14501e-17				D7Bwg0826e	-2.45892	5.08011e-08
Gm22774	5.92847	1.81194e-16				Hemgn	-1.65831	1.26556e-07
Ftl2-ps	9.90006	6.4237e-16				Slc4a1	-1.03197	2.80936e-07
Gm12164	4.95584	8.08215e-16				Serpina6	-5.06528	8.75582e-07
Gm15545	1.31399	1.19866e-15				Clrn1	-0.931426	1.24916e-06
Hrc	1.59579	1.88749e-14				Ccr2	-1.52103	1.35456e-06
Fut2	1.6631	2.37976e-10				Fuz	-1.27008	1.88919e-06
Ldha-ps2	3.54554	7.2014e-10				Gm31597	-6.90768	3.59043e-06
Tlx2	3.708	1.74715e-09				Ly86	-1.27965	8.77609e-06
Dkkl1	1.82716	4.00771e-09				Fam71e1	-0.721981	9.27651e-06
Gpihbp1	1.35663	7.15943e-09				Gm45311	-6.71856	1.05442e-05
Cartpt	3.85051	8.45645e-09				Krt36	-1.77901	1.43349e-05
Grin2d	1.14578	9.84034e-09				Gm30938	-7.44957	1.59404e-05
Car11	1.67219	3.45018e-08				Ermap	-1.34543	2.02491e-05
Slc18a3	5.21499	5.88799e-08				Ms4a6c	-1.4452	2.07792e-05
Trpm4	1.07143	1.60354e-07				Ptch2	-0.76981	2.1241e-05
Phox2a	1.94922	2.38146e-07				Elfn1	-0.897915	2.43794e-05
Oit3	1.32094	2.97621e-07				Ap2a1	-0.505535	2.55262e-05
Aldh1a3	1.26197	6.2339e-07				Wdfy4	-0.783813	2.55473e-05
Kcnj14	1.01805	6.81291e-07				Acan	-2.33488	2.70958e-05
Aire	2.15433	7.83878e-07				Myocd	-1.05899	3.95173e-05
Chgb	2.52921	7.89128e-07				Khdc3	-5.69536	4.12353e-05
Gm18736	6.85874	1.58798e-06				Hk3	-0.888738	4.4359e-05
Mt1	1.79824	1.97024e-06				Gata1	-1.97738	4.87304e-05
Cntn4	0.700622	2.2981e-06				Ascl1	-1.42997	5.17764e-05
Mamstr	0.714926	3.22444e-06				Atp2b2	-0.932777	5.5405e-05
Ido2	3.21114	3.33525e-06				Tph1	-1.88587	6.05504e-05
Prph	2.36088	3.75362e-06				Mpo	-2.96711	8.2413e-05
Atp12a	1.3263	4.4008e-06				Gm8494	-2.29916	8.93808e-05
Sst	2.89528	5.1788e-06				Gm4811	-4.06699	9.15639e-05
H2-Q6	1.357	5.31775e-06				4930481A15Rik	-1.47798	9.34238e-05
Isl1	2.23845	6.93745e-06				Kcnd3	-0.789099	0.000100883
Gm26445	5.44723	1.0361e-05				Apob	-2.38714	0.000105357
Plpp4	1.28881	1.58466e-05				Pla2g2f	-3.97195	0.000142175
Mt2	1.82357	2.02209e-05				Alb	-3.15984	0.000154233
Dbp	1.53423	2.18081e-05				Mgam	-0.934212	0.000158783
Mapk15	0.705633	2.24594e-05				Cx3cr1	-0.960703	0.000162587
Ptprn	2.14167	2.43754e-05				Ighm	-1.02364	0.00016896
Gm40466	1.06387	3.13703e-05				Ptchd3	-2.5848	0.000192414
Scg2	2.5135	3.54667e-05				Gm11541	-1.35666	0.000203261
Gm9256	3.69722	4.51599e-05				Syngr4	-1.95641	0.000206994
Neat1	0.716547	4.65507e-05				Tent5c	-1.45935	0.000215318
Syne4	0.508451	5.46907e-05				Zfp819	-3.18909	0.000251768
Gm13365	6.83445	5.47501e-05				Gm37416	-1.1715	0.000264844
Cxcl13	1.67212	5.61036e-05				Rprml	-4.26378	0.000296964
Fhad1	1.6026	5.8434e-05				Cd180	-1.22154	0.000301109
Hmga1b	4.86195	8.05823e-05				Bace2	-0.833982	0.000345358
Grm4	1.5762	9.02502e-05				Steap3	-1.39736	0.000352331
Shisa7	0.59042	0.00010072				Gja8	-1.49649	0.000368513
Adm2	2.48407	0.000102508				Cmklr1	-0.620204	0.000393304
Mir692-1	5.07623	0.000111574				Ms4a10	-6.25879	0.000410796
Tbx3os1	0.869677	0.0001232				Gm11549	-4.42094	0.000427989
Ttll10	0.821138	0.000124057				Lrrn4	-1.67527	0.000430719
Ppp1r1b	1.18651	0.000130425				Mdn1	-0.857269	0.000454734
Pcsk4	0.807778	0.000135132				Nckap1l	-0.647333	0.000459674
Ackr2	2.33531	0.000161702				2200002J24Rik	-5.37245	0.000466004
Gm48942	4.02795	0.00017269				Ms4a4a	-1.00008	0.000477934
Stmn3	1.77494	0.000172781				Gm38340	-1.94972	0.000509361
Aspg	0.753193	0.000173184				Itih2	-1.10737	0.000522032
Gm16754	2.12418	0.000181518				Angptl7	-0.895285	0.000550383
Gm27861	1.85535	0.000230591				Trem2	-1.17794	0.000556641
Zfp712	0.91467	0.000292556				Hps5	-0.523533	0.000584999
9530018H14Rik	2.1714	0.000292625				P2ry13	-1.25172	0.000625336
H2-Q7	1.19314	0.000323724				Gm19461	-1.94803	0.000630794
Celf3	1.46079	0.000324324				Myo1g	-1.01625	0.000689673
Gm13443	4.82404	0.000325326				Krt14	-4.84776	0.000705063
Gstt1	0.633712	0.00032635				Gm28496	-2.44716	0.000717792
Fut1	1.77691	0.000329199				En2	-0.845511	0.000732733
G630016G05Rik	0.789793	0.000330256				Clec7a	-1.52053	0.00075121
Kcnn1	0.87564	0.000333731				Gm49442	-6.11493	0.000761652
Sncb	6.10313	0.000401096				Dock2	-0.656727	0.000772252
Cxcl15	5.78761	0.000407315				Gna14	-0.932979	0.000803223
Miat	1.04216	0.000424664				Platr26	-6.16687	0.000832586
Ldha	1.18918	0.000424828				Fam180a	-5.83253	0.000832957
Myo3b	0.906935	0.000428114				Calr4	-2.10917	0.000849015
Gm5823	3.35383	0.000463803				Gm45001	-1.26724	0.000863391
Pgk1	1.25346	0.000486384				Lrmp	-0.780623	0.000880989
Gm7335	5.2733	0.000533244				Gm10252	-1.97115	0.000889268
A230107N01Rik	0.827106	0.000592456				Upk3b	-1.67063	0.00092014
H2-DMb1	0.618563	0.000600974				Rhd	-1.35131	0.000960317
Ccdc3	0.840717	0.000619066				Acta2	-1.10889	0.00100502
1700058P15Rik	0.796532	0.000620659				Fancf	-0.727456	0.00101571
Syt3	0.71055	0.000639322				Irf3	-0.481513	0.00106031
Slc10a4	1.11337	0.000655142				Lefty1	-2.39938	0.00107386
Ushbp1	0.431337	0.000679388				Gypa	-1.2232	0.00112704
Tmc4	0.487218	0.000715745				A230056P14Rik	-1.05873	0.00113359
Cox4i2	1.47785	0.000726659				1700054A03Rik	-2.58285	0.00114362
Gm5522	5.17857	0.000747765				Pdlim3	-1.34789	0.00124266
Abcc6	0.961262	0.000782346				Wnt2b	-1.2345	0.00125131
Gm45041	2.1952	0.000813662				Gm44646	-1.41067	0.00125168
A2m	1.83314	0.000847141				Mir9-3hg	-2.67791	0.00127418
1700008O03Rik	1.46513	0.000921827				Cnn1	-1.71495	0.00132862
Gm44154	1.4176	0.000969973				Edn2	-4.32341	0.00134867
Cdh9	1.85954	0.000979326				Itgal	-0.802157	0.00141971
Gm17491	0.655724	0.000995094				Il6ra	-0.717452	0.00147001
Gm37174	1.0563	0.00100326				Mylk4	-1.96136	0.00152416
Tmem159	0.451643	0.00103454				Fermt3	-0.548211	0.00155855
Pfkl	1.14118	0.00103488				Gm49390	-5.75588	0.00159712
Tcim	0.523947	0.00105464				Plg	-4.19581	0.00161064
Tnfsf9	1.17077	0.00108422				9130410C08Rik	-0.770337	0.00166218
Mroh7	0.984466	0.0011065				Traf3ip3	-1.41131	0.00166709
Tpi1	1.01152	0.00111477				Egr1	-0.788281	0.0016968
Kcne3	2.6495	0.00111933				Casq2	-3.91532	0.00175079
Gm44669	1.42723	0.00114641				Trim10	-1.45788	0.00188417
Rgs4	1.13636	0.00116588				F13a1	-0.863446	0.00194574
Adora2a	1.20953	0.00117323				Tlr9	-1.12373	0.00195654
Gm45170	0.957671	0.00118619				Adgre4	-1.57706	0.00197759
Phox2b	2.1927	0.00120419				Synm	-1.17647	0.0020369
C130012C08Rik	0.866857	0.00122126				Treml2	-1.06403	0.00204315
Kcnq2	2.51734	0.00125001				Nr0b1	-1.77661	0.00205363
Pcsk1n	1.51396	0.0012732				Gm39929	-2.06359	0.00214339
Pitx1	1.97765	0.00129934				Sox8	-1.01209	0.0021675
Cyp2d22	0.935932	0.00131202				Krt42	-6.14525	0.00219033
Fn3k	1.31321	0.00132257				P2ry6	-0.842497	0.00222236
Zfp874a	0.826903	0.00137924				Zyg11a	-2.07126	0.00224848
1700029J07Rik	0.77271	0.00139807				Dock5	-0.495191	0.0022562
Gm13262	0.791029	0.00144829				Pnkp	-0.404208	0.00227018
Lgals4	0.589639	0.00149975				Lyz2	-0.757896	0.00228515
Kcnk9	1.78692	0.00151984				Gm28410	-3.46948	0.00228935
Esm1	1.45739	0.0015247				Acsm1	-2.22286	0.00231743
Acer2	0.735993	0.00156269				Naa11	-4.88756	0.00232875
Eno1	1.09238	0.00156998				Rhox5	-2.16418	0.00237308
H2-Eb1	0.667238	0.00159862				Hspb8	-0.474141	0.00247005
Rtp4	1.47254	0.00160743				Bin2	-1.1658	0.00248241
Tcp11	0.528885	0.00162918				Prmt3	-0.38487	0.00256943
Pde4c	0.713856	0.00163199				5430401H09Rik	-2.33103	0.00263093
Aldoa	1.19408	0.00164536				Cpa3	-1.28117	0.00265377
Jakmip3	1.03204	0.00164865				Gm37827	-2.1478	0.00280401
Pde4b	1.22621	0.00165645				Tpcn1	-0.334746	0.00281315
Dbh	4.42019	0.00166846				Actg2	-2.25645	0.00284031
H2-T-ps	3.57198	0.00168623				Gm44067	-1.55777	0.00289441
Junb	0.88147	0.001696				Lrrc75aos2	-1.75136	0.00293585
Cpt1b	1.15789	0.0017128				Tpsb2	-4.09564	0.00299156
Gm15222	0.489935	0.00178116				Gm5599	-3.13224	0.0030646
2700069I18Rik	5.23855	0.00178328				Plce1	-0.421687	0.00308734
Cutal	0.692157	0.00178953				Adcyap1	-4.43578	0.00325048
Cd164l2	0.814023	0.00186418				Sp5	-0.558821	0.00326842
5830408C22Rik	1.893	0.00191314				Itgb2	-0.763551	0.00335833
Gm20033	0.759197	0.0019572				Tspan32	-1.01831	0.00341067
Aqp6	1.26548	0.0019652				E230020A03Rik	-1.37205	0.00342926
Hnf1aos1	0.620447	0.00198115				Myo1f	-0.785053	0.00358361
Nwd2	0.804262	0.00202171				Gabrb3	-0.509963	0.00366163
Rps6-ps4	0.761071	0.00202455				Tifab	-0.8199	0.00367466
Gm12868	2.39938	0.00206571				Gm15610	-2.55152	0.0036785
1810020O05Rik	1.32804	0.00209421				Sycp3	-2.38892	0.0037485
Tnfaip3	1.39899	0.00213165				Cyp1b1	-0.555969	0.00380833
Traf1	0.750805	0.00215828				Heatr1	-0.518739	0.00380938
Serhl	0.526023	0.0021634				C2cd4a	-0.631597	0.00389207
Mogat2	0.972096	0.00220345				Ces1d	-2.721	0.0039187
Gm14207	0.750652	0.00223507				Atp1b4	-2.90999	0.00394053
Elavl3	1.15766	0.00226183				Apobec2	-1.43249	0.00394221
Gm12247	4.40775	0.00227411				Gm49863	-2.32134	0.00396707
Rgl3	0.563275	0.00228959				Ifi207	-0.737716	0.00400169
Eno2	1.1658	0.00229114				Rhag	-1.40131	0.00401795
Gm10037	1.12066	0.00231752				Zfp979	-1.19895	0.00403632
Acad10	0.464943	0.00250654				Acsm3	-0.645061	0.0040423
St6galnac5	1.09708	0.00252097				Rims4	-1.33068	0.00413375
Evx2	5.86	0.00253672				Smim40	-3.68033	0.00416857
E130008D07Rik	0.969051	0.00253955				Lor	-1.12593	0.00421969
Hotairm1	1.07271	0.00260868				Heyl	-0.684069	0.0042201
Zmynd10	0.727027	0.00262733				Smim41	-0.846306	0.00424631
Avpr1a	0.914452	0.00263367				Rac2	-0.585771	0.00432923
Paqr6	1.23438	0.00263902				Gm26868	-5.1696	0.00434809
Zfp473	0.71023	0.00272443				Klhl34	-0.58958	0.00445558
Ubxn11	0.718185	0.00273556				Tll1	-0.696683	0.00460888
Gm15594	2.3906	0.0027362				Slc47a2	-2.73118	0.00469987
Gm45774	1.68492	0.00277186				Gldc	-0.407168	0.00476269
Mymx	0.741287	0.00277495				Vav1	-0.646655	0.0048201
Gm29264	1.69737	0.00279177				Itih3	-1.95421	0.00500683
Adamts6	1.19795	0.00282167				Evi2a	-0.77101	0.00503917
9630002D21Rik	0.921586	0.00284862				Gm15513	-1.93983	0.00509894
Fcgbp	0.787128	0.00285867				Pcp4l1	-1.42086	0.00510055
Dlx5	2.43748	0.00288984				Dock3	-1.23366	0.00513235
Gck	0.83998	0.00289941				Gm47547	-1.07934	0.00515731
5730596B20Rik	0.733525	0.0029105				Themis2	-0.73342	0.0051624
Zfr2	0.971237	0.00295095				Herc2	-0.494148	0.00521674
Gm43338	0.680631	0.00297845				Tmem86a	-1.04039	0.00539593
Id1	0.408544	0.00300387				Ankrd66	-1.55991	0.00552119
Sparcl1	1.03493	0.00300621				Slc9b1	-1.63379	0.00561913
Atcay	1.08691	0.00300916				Ermn	-3.21154	0.00577117
2610528A11Rik	2.44284	0.00305822				Slfn14	-1.40736	0.00577637
Abhd14b	0.522595	0.00308872				D630033O11Rik	-1.22728	0.00578332
Alox15	0.914775	0.00309567				Alpl	-0.76427	0.00581419
1700088E04Rik	0.916849	0.00319361				Lama3	-0.789083	0.00581471
4932422M17Rik	0.633167	0.00319537				Dync1i1	-0.861623	0.00582247
Depp1	1.2807	0.00323131				Zdhhc2	-0.597091	0.00582447
Arhgap20os	2.33108	0.00326524				Frmpd1	-1.62698	0.00582572
Rubcnl	1.74472	0.00331156				Syt7	-0.512461	0.00586575
Ppil6	0.768842	0.00332064				Ccl17	-5.11295	0.00587084
Upp1	0.716031	0.00335278				Gli1	-0.792882	0.00602063
Slc6a2	2.86218	0.00337087				Plppr4	-1.65963	0.00603615
Matk	0.809152	0.00337269				Ankfn1	-1.83941	0.00608654
Gabre	1.27755	0.00340578				Tlr8	-1.35075	0.00614693
C920021L13Rik	0.722548	0.00348384				Arhgap30	-0.654034	0.00621992
Gstt3	0.607608	0.0035532				Actn2	-1.56843	0.00627776
Ndufa4l2	1.15747	0.0036146				Smarca5-ps	-0.751269	0.00631973
Gm5577	0.417179	0.00361812				Htra1	-1.20849	0.00637668
Mpg	0.382691	0.00364764				Tubb1	-1.30227	0.0064388
Tbx3os2	0.804579	0.00366621				Gm42462	-1.00396	0.00646328
Gm30541	2.58395	0.00374558				Sh3rf3	-0.619919	0.00647606
Runx2	0.689901	0.00379557				Slc17a7	-0.927326	0.00648771
Ces1e	4.85422	0.00381466				0610005C13Rik	-0.775778	0.00667511
Elf3	1.0658	0.00388188				Ano5	-0.640846	0.00674154
Cnr2	1.23143	0.00391053				Utp20	-0.435019	0.00675303
Noxa1	1.02291	0.00392331				C430042M11Rik	-2.20462	0.00685111
Naga	0.728929	0.00394587				Ranbp2	-0.374256	0.00696379
Grm3	1.24326	0.00396642				Mical2	-0.794478	0.0069773
Masp2	1.00084	0.00398026				4933413J09Rik	-2.06624	0.00698161
Gm18180	2.26399	0.00405696				Tex11	-4.10718	0.00700504
Edn1	1.08883	0.00406774				Hrg	-3.51671	0.00703753
4930535L15Rik	1.41277	0.00410116				Gm715	-0.978871	0.00716223
AU015791	0.47801	0.00417476				Snca	-0.829194	0.00720437
Gm10503	9.56931	0.00420742				Gm12532	-5.78087	0.00731474
A830052D11Rik	1.04447	0.00425669				mt-Nd5	-0.711044	0.00731649
Gng8	0.739416	0.00426044				Jaml	-3.48595	0.00733798
Tjp3	0.65285	0.00429056				Clec4a1	-0.744271	0.00736682
Nsg2	0.985805	0.00429474				Neto2	-0.320058	0.00749106
Wdr86	0.355262	0.0043248				Slc38a5	-1.143	0.00761238
9430065F17Rik	1.47632	0.00435282				Fmr1nb	-3.82094	0.00764181
1700123M08Rik	0.801985	0.00439119				Nexmif	-0.962753	0.00764977
Dennd2d	0.585394	0.00439216				Tmem121b	-0.852386	0.00772571
Cyp27a1	0.848557	0.00442041				Nectin1	-0.420616	0.00775808
Gm48909	0.946749	0.00442265				Zfp991	-0.514622	0.00786483
Mettl27	0.386831	0.00442296				Gtsf1l	-3.76611	0.00788968
Apold1	1.18255	0.00447155				Synj2	-0.396346	0.00789501
Gm32592	3.67685	0.00459111				Slc7a5	-0.521558	0.00803945
Trappc6a	0.668177	0.00459753				Gm2381	-3.14006	0.00812051
Ecel1	0.912899	0.00461132				Jakmip2	-1.13149	0.00845654
Shfl	0.688659	0.00466594				Znf41-ps	-0.576767	0.00851577
Fam129c	0.756689	0.00469879				Zfyve28	-1.29227	0.00856619
Chkb	0.744468	0.00470051				Gm42528	-1.45981	0.00861763
Dennd6b	0.360053	0.00482899				Tnfrsf1b	-0.650011	0.0087497
Arrdc1	0.38586	0.00484405				Gpr55	-1.5823	0.0088346
H2-K1	0.692554	0.00485774				Oxtr	-0.518566	0.00914224
Wnt10a	1.19945	0.00489088				Gm13261	-3.16406	0.0092044
Gm46404	1.09087	0.00489245				6030468B19Rik	-1.69559	0.00925468
Gm15050	0.83339	0.00489756				Ikzf1	-0.66965	0.00925935
Gm3336	1.75888	0.00496387				Fzd10	-0.544028	0.00931822
Tmem241	0.353357	0.00501202				Csrp3	-4.2732	0.00938366
Crabp1	1.08734	0.00503987				Map2	-0.330998	0.0095071
Gm48500	1.99137	0.00505735				Ces2g	-1.25031	0.00951852
Pygl	0.727965	0.00508611				Gm6916	-4.31544	0.00959278
Wsb1	0.629684	0.00508769				Urb2	-0.311964	0.00970261
Akr1c14	1.15733	0.00519207				Msc	-1.04311	0.00977226
Gm5559	0.57772	0.00519229				Dnaic1	-1.52087	0.00991991
Gm6627	1.61466	0.00520774				Asprv1	-1.04778	0.00993026
Sema4g	0.959246	0.00524667				Rpl19-ps3	-1.32825	0.0102844
Grhpr	0.668988	0.00527663				Lmod1	-0.743004	0.0103767
Gm10767	0.706438	0.00531715				Adad1	-1.92598	0.0104705
Lilrb4a	2.12565	0.00534531				Gm13245	-1.10006	0.0105357
Zfp493	0.420002	0.00540824				Gpr83	-1.1858	0.0106284
Myo15	0.655192	0.00543981				Sash3	-0.628307	0.0106886
Galt	0.370146	0.00546587				Cd53	-0.761489	0.0107385
Lilr4b	2.13344	0.00551089				Extl1	-1.12379	0.0108392
Hoxd1	0.999182	0.00562763				Adamts8	-0.91607	0.010859
Gm38708	0.677184	0.00569872				Cspg5	-0.570473	0.0109626
Zfp429	1.33244	0.00570885				Rassf5	-1.173	0.0110062
Gm7336	0.579526	0.00571436				Rhbdl3	-0.721753	0.0110163
2610005L07Rik	0.400809	0.00577811				Nodal	-1.90743	0.0110328
Myo16	0.916545	0.00578533				Cend1	-0.504705	0.0110485
2810433D01Rik	0.932547	0.00584488				P2ry12	-1.01441	0.01107
Gm19046	1.88486	0.0058778				Tcf7	-0.463818	0.0111551
H2-Ab1	0.927281	0.00590125				Pld4	-0.672859	0.011179
Nfkbiz	0.616133	0.0059137				Gjb2	-1.10799	0.0114728
Snhg20	0.39602	0.00601766				Vnn3	-2.0504	0.0115089
Amer3	5.11619	0.0060804				Gm20541	-2.01342	0.0116737
Gpr149	2.1116	0.00612648				Myh1	-2.6509	0.0116979
Gm43759	1.18159	0.00616293				Sacs	-0.455814	0.0117167
Gipr	1.51508	0.00625834				Osbpl11	-0.417811	0.0117169
Itgbl1	1.77377	0.00629869				Mageb7-ps	-5.36631	0.011786
Gm50103	0.874729	0.00636198				Bmp8a	-1.89012	0.0117915
Dhdh	0.626172	0.0063817				Tm4sf5	-2.23809	0.0118803
Cacna2d3	1.08356	0.00638977				Gal	-3.20767	0.0118811
Gpi1	0.940271	0.00644974				Me2	-0.300796	0.0120375
Neu1	0.5348	0.00648903				4933425L06Rik	-4.09866	0.0120474
A830011K09Rik	2.53745	0.00650708				Gm45235	-0.580355	0.0120658
Gmfg	0.603869	0.00652635				Gas2	-0.418978	0.0121342
Tmem178b	1.57818	0.00658994				Zfy1	-4.49282	0.0121387
Gm13075	1.42347	0.00666204				Colec11	-1.31961	0.0121538
H2-Q4	0.473943	0.00675835				Plxna1	-0.357295	0.0122693
Pcdhac2	1.27791	0.00678088				Sla	-0.767789	0.012323
Tnr	2.11286	0.00679909				Cad	-0.343084	0.0123519
Scn3a	1.31348	0.00683318				Timp1	-0.747065	0.0123733
1600014C23Rik	2.17397	0.00685009				Krt15	-0.958108	0.012472
AC109619.1	0.584131	0.00690617				3930402G23Rik	-0.669317	0.0125073
Gm15478	0.597918	0.00692288				Myh8	-2.64978	0.0125085
Npy2r	0.86734	0.00692379				E2f8	-0.293871	0.0126491
4930426D05Rik	0.44336	0.00696357				Trac	-1.42265	0.0127487
Ipcef1	0.607415	0.00698238				Slc37a2	-0.548661	0.0127522
Gm5628	0.80001	0.00702168				Hapln1	-0.386264	0.0127912
Ache	0.873709	0.00702182				Tcf23	-1.13388	0.0128875
Ppfia3	0.411968	0.00705844				Chsy1	-0.328778	0.0128883
Gm9575	1.00283	0.00714533				Tktl1	-3.0901	0.013102
Crym	0.909751	0.00725199				Gm36684	-2.21403	0.0132867
H2-K2	1.27966	0.00728359				Adgra1	-0.713553	0.0133053
Ifi44	1.55176	0.00733145				Ctsw	-2.00418	0.0134319
Plch2	0.496234	0.0073476				Ms4a6b	-0.75519	0.0136175
Gm28265	1.08158	0.0073526				Gas6	-0.494056	0.0138487
Mir210	3.10128	0.00735375				Ddit4l	-0.923545	0.0138508
Atg9b	1.17436	0.00737117				Adcy7	-0.993415	0.013854
Klk9	1.39436	0.00744146				Ifit2	-0.306982	0.0140155
Dpys	1.18046	0.00751269				Gm32031	-0.541762	0.0140577
Evx1os	2.76543	0.00752211				Il18	-0.952922	0.0140685
Dll4	0.542255	0.00757419				Gm5242	-1.30777	0.0141033
Tnmd	3.15652	0.00761568				Dmrtc1b	-4.42668	0.0141667
Slc25a42	0.483237	0.00762648				Hells	-0.415096	0.0142132
Tas1r1	0.676432	0.00763374				Kcnk12	-2.27551	0.0142172
Gm13372	1.27059	0.00763715				Ibsp	-3.99792	0.0142526
Gm37779	3.0206	0.00766318				Emc10	-0.330452	0.0144331
Alkal2	1.82284	0.00766411				Olfr330	-4.59973	0.0144942
Hlx	0.673817	0.0076843				Apba2	-0.878301	0.0145597
Prelid2	1.09882	0.00769042				Kcnmb4	-0.599422	0.0145616
Nlrp6	0.901913	0.00773021				Cyth4	-0.553091	0.0146282
Klk10	1.15591	0.00774131				Ppp1r16b	-0.537482	0.0146999
Cers1	1.25578	0.00775725				D430020J02Rik	-0.308085	0.0148192
Zfp990	0.79276	0.00779924				Mtmr10	-0.488574	0.0148301
Sec31b	0.475444	0.00782177				Btaf1	-0.397061	0.0151955
Disp2	1.34436	0.00782578				Retn	-1.77006	0.015217
H2-DMa	0.479464	0.00795202				Kcnip3	-0.413011	0.0152976
Clybl	0.586732	0.00799954				Mamld1	-0.878643	0.0153409
Cfap54	0.920521	0.00802816				Aoc3	-1.06726	0.0154039
Ccdc114	0.552768	0.00803323				Cd48	-0.997049	0.0154306
Gm4070	2.88524	0.00804602				Dicer1	-0.394624	0.0154532
Prdx2-ps1	3.84807	0.0081291				Gm8337	-1.45714	0.0154634
Hoxa3	0.609781	0.00815101				Lpl	-0.521935	0.0155523
Gm42755	2.17688	0.00820053				Gm6548	-0.553906	0.0155689
Hcfc1r1	0.356402	0.0082135				Map1a	-0.388815	0.0156288
Lrrc34	0.612871	0.00823849				Gm5425	-1.4552	0.0157147
Clk1	0.744524	0.0082397				Gm30074	-0.883755	0.0158903
Gm35610	0.505398	0.00832079				Elmo1	-0.329657	0.0159819
Scn3b	1.14845	0.00838294				Pabpc1l2a-ps	-2.8932	0.0161207
Rasa4	0.704227	0.00840018				Tlr13	-0.80024	0.0161529
Gm34354	0.66424	0.00846114				Syk	-0.375997	0.0162798
Gucy2e	0.746456	0.00850588				Gm6440	-3.144	0.0162803
Gm48734	0.968153	0.00851661				Bves	-0.514446	0.0164083
Adamtsl1	0.918894	0.00855109				Rimkla	-0.356138	0.0166627
Macrod1	0.521192	0.00861286				Gm11413	-3.12779	0.0168393
Eps8l1	0.827163	0.00868925				Gm36595	-1.03883	0.0168501
Ankrd24	0.591	0.00873057				Rbm24	-0.562028	0.0168601
Pcdh20	1.64517	0.00873955				Gpr65	-0.828436	0.0168856
BC030343	0.668331	0.00890989				Gm28900	-3.22124	0.0168881
Ribc2	0.946588	0.00899644				Akr1b8	-0.984072	0.0169046
Gfra3	0.963059	0.00908003				Gm37307	-2.77155	0.0169441
BB218582	0.900839	0.00908526				C1rb	-2.4095	0.0170271
Gjb5	1.36986	0.00910045				Gm13241	-0.985982	0.0170486
Gm16565	1.1022	0.0091586				Hesx1	-1.45819	0.0170683
Gm16201	1.09596	0.00924268				Pphln1	-0.340127	0.0171141
Gm12867	2.14366	0.00926443				Lncbate6	-2.22104	0.0173342
Gpr162	0.676309	0.00926735				Nlrp14	-4.72641	0.0173794
Slc40a1	0.369361	0.0092681				Pla2g4c-ps	-2.33741	0.0173941
F3	0.452023	0.00928824				Vstm4	-0.393744	0.0174019
Gm50240	0.479743	0.00931491				Casp8ap2	-0.359316	0.0174581
Mapkapk3	0.500615	0.00932652				Reep2	-0.909762	0.0177135
Lcn2	1.032	0.00936057				Gm26740	-2.46764	0.0178029
Pcdhb4	0.593094	0.00937193				Pkd1l1	-0.830417	0.0178362
Elf5	0.6667	0.00937975				Gfi1b	-1.74069	0.017855
Kcns3	0.635328	0.00942591				Ddi2	-0.357107	0.0178904
Hotair	0.836345	0.00945071				Ptpre	-0.634001	0.0179536
Ptn	0.323181	0.00951305				Hspa4l	-0.423183	0.0179871
Stmn4	2.01174	0.00956475				AI427809	-1.5413	0.018077
Gpr146	0.798715	0.00958232				Heatr5a	-0.325329	0.0182767
Oasl1	0.756983	0.00958729				Insyn2a	-0.623229	0.0183461
Gcgr	0.651616	0.0096522				Hsph1	-0.677539	0.0183737
Olfr1372-ps1	0.740247	0.00969793				Upk1b	-1.19503	0.0184335
Coq8b	0.539893	0.00985049				D130079A08Rik	-2.8321	0.0187535
Slc2a8	0.443145	0.00986754				Atp10a	-0.398157	0.0187778
Tgfbi	0.787136	0.00988308				Gm19265	-0.717343	0.0188553
Gm50152	1.30834	0.00997681				Tnnt2	-1.09867	0.0189718
Abhd18	1.17497	0.0099869				Myoc	-2.29068	0.0189813
Rpl17	0.300613	0.0100108				Kbtbd8	-0.718689	0.0189822
Vldlr	0.992382	0.0101528				Slc11a1	-0.604016	0.0189964
Ppp1r3g	2.50693	0.0101638				Card9	-0.816774	0.0190435
C230035I16Rik	0.661387	0.0101697				Hivep3	-0.495396	0.0190837
Tc2n	0.729141	0.0101783				Sema7a	-0.958032	0.0190877
Slc16a14	1.6603	0.0102082				Hist1h2bc	-0.666607	0.0193044
Arhgap33os	1.75407	0.0102523				Tma7-ps	-3.34955	0.0196221
Hoxa2	0.400258	0.0103141				F2	-2.09434	0.019686
4930474M22Rik	1.77073	0.010479				Fkbp5	-0.521477	0.0197087
Klf15	0.468567	0.0105404				Bank1	-0.88259	0.0197264
Eml2	0.489504	0.010614				Ccdc152	-1.64185	0.0198556
Gm26724	0.894558	0.0106152				Serpina1d	-2.41206	0.0198615
Vamp2	0.429906	0.0106372				Nup62cl	-0.947706	0.0199665
Sntg1	1.66056	0.0106729				Gm45897	-2.71453	0.0200502
AI480526	0.624972	0.0106736				Xpo5	-0.252025	0.0200756
Cpt1c	0.733417	0.0107337				Gm13340	-0.635295	0.020096
Slc38a3	1.09484	0.0107503				Ces1c	-3.98167	0.0201527
Cdhr4	0.717291	0.0107587				Gm25352	-6.2948	0.0203384
Jak3	0.640556	0.0107973				Gm43102	-4.82753	0.0204969
Gm27817	0.924378	0.0108493				Zfp518a	-0.428877	0.0205195
4930412C18Rik	0.726591	0.0108537				Kank4	-0.316887	0.020871
Flt1	1.01619	0.0108938				Gm10038	-3.91197	0.0210404
Adm	2.49906	0.0109134				Gm5459	-3.18025	0.0212527
Napsa	1.84155	0.0109184				Gm22615	-2.69798	0.0212685
Hoxa9	0.370058	0.0109647				Cabp1	-0.696682	0.0213362
Celf5	0.740312	0.0109867				Fbxl22	-1.17195	0.0213754
Cntd1	0.812664	0.0110862				Krt5	-2.16806	0.0214866
Gm45745	3.50777	0.0110895				Dtx4	-0.519255	0.0215201
Bdh2	0.694954	0.0112012				Taf4b	-0.744585	0.0215417
1810010H24Rik	0.934795	0.0112137				Ptpn5	-1.13414	0.0217206
Rorc	0.580688	0.0114204				Gm20075	-1.22502	0.0218206
Sept4	0.397707	0.0114307				Uevld	-0.567162	0.0219472
Icam1	0.666834	0.011441				Gtsf1	-3.68729	0.0221216
E130102H24Rik	0.851024	0.0115842				Kcnk3	-2.05746	0.0221965
Tmem143	0.725674	0.011588				Mpeg1	-0.706725	0.0223341
Tmem51os1	0.827977	0.0116153				Abcg1	-0.472106	0.0223854
Gbp9	0.75071	0.0116319				Gm49767	-2.23016	0.0228565
1110035H17Rik	1.17596	0.0116566				Gm44104	-2.58019	0.0229042
Ttc9	0.737747	0.0117602				Slitrk2	-0.993852	0.0229753
Lin7b	0.927878	0.0118496				Rgs10	-0.57729	0.0230263
Gm15612	0.974717	0.0118894				Tlr7	-0.65147	0.0230452
Mx2	1.60246	0.0119987				Fetub	-2.54251	0.0230967
Tmem191c	0.530385	0.0120458				Naa15	-0.300343	0.0231376
Prelid1	0.336544	0.0120792				Gm4107	-3.6076	0.023209
Camk2n1	0.383331	0.0123371				Gm10561	-0.572454	0.0232877
C530005A16Rik	0.928529	0.0124683				Olfr78	-1.14776	0.0234686
AC099699.1	0.476879	0.0125826				Gm9755	-0.892141	0.0235854
Rassf7	0.316981	0.0125844				1700017G19Rik	-1.75126	0.023587
Ikzf3	0.81915	0.0126397				Igsf11	-0.852183	0.0235956
Prss41	0.895865	0.01269				Cldn34c1	-0.470572	0.0236432
Adgrg3	0.467302	0.0128191				A730089K16Rik	-0.866807	0.023741
Tnip2	0.407494	0.0128767				Slc7a1	-0.303122	0.0239207
Gm13283	0.873422	0.0129516				Gm5784	-0.444447	0.0240772
Rgs17	1.0542	0.0130319				Macf1	-0.390218	0.0242822
Dmrt2	1.32451	0.0130651				Elfn2	-0.995686	0.0242973
Sgk1	0.346978	0.0130984				Smpx	-1.22936	0.0245092
Gdpd3	0.861017	0.0131357				Kitl	-0.346716	0.0245371
Gm7785	1.5304	0.0131592				Trpc6	-1.069	0.0245477
Usp18	0.766549	0.0131977				Cp	-0.787011	0.0246182
1700094M23Rik	3.00372	0.0132855				Gm38534	-1.96735	0.02464
Gpr135	0.4897	0.0133359				Spaca1	-0.782725	0.024677
Pold4	0.539134	0.0133488				Kndc1	-1.42542	0.024854
Ramp3	0.509363	0.0133896				Plaa	-0.278197	0.0249998
Gm44597	0.961085	0.0134895				Igsf6	-0.667287	0.0251244
Unc5d	0.987505	0.0137118				Zcchc12	-0.427007	0.0251338
Gfap	0.665208	0.0138596				Aldh3b2	-0.897227	0.0251879
Pkm	0.703048	0.0140138				Ntn3	-0.340736	0.0252502
Gm15567	1.14039	0.0140716				Gm47064	-6.15743	0.0253764
Cav1	0.568258	0.0140787				Gm7896	-6.15743	0.0253764
Ccdc13	0.66257	0.0141052				Gm37233	-0.683413	0.0254423
Gm45844	0.994985	0.0141469				Gatm	-1.81929	0.0254773
Gm30015	0.759188	0.0142334				Cntn2	-0.705307	0.0255027
Olfr341	2.78126	0.0142367				Zfp345	-1.34014	0.0259039
2900052L18Rik	0.537312	0.0144124				Alas1	-0.932151	0.0259889
Mgat4e	2.17581	0.0145321				Ndc1	-0.281508	0.025993
Tecta	0.904349	0.0145862				Csf1r	-0.554635	0.0260068
Gm44686	0.809159	0.0146057				Fbp1	-1.33543	0.0261072
Gm10874	1.80518	0.0146642				Togaram2	-1.48074	0.0262305
Sgsm1	0.536868	0.0147178				Gramd1b	-0.867259	0.0263211
Pgam1	0.787122	0.0148733				Ide	-0.378972	0.0263499
Lrrc4b	0.619199	0.0148812				Itpka	-0.76358	0.026432
S1pr5	1.86851	0.0149662				A530016L24Rik	-1.82327	0.0265029
Lrrc56	0.430761	0.0149816				Vnn1	-1.92269	0.0268079
Edn3	0.761576	0.0149919				Mipepos	-2.89317	0.0269842
Zfp595	0.340933	0.0150969				Igfbpl1	-1.75773	0.027151
Btg3	0.61352	0.0151227				Mylk	-0.479471	0.0272633
Panx2	0.980467	0.0151398				Map7d2	-0.691986	0.0272853
Rps13-ps2	1.7415	0.0151537				Zfp750	-1.13583	0.0273286
Pdzrn4	0.788881	0.0151604				Gm29361	-0.56332	0.0275155
Gm13648	0.448511	0.0151865				Sp9	-1.41868	0.0275397
Gm26280	1.16252	0.0152177				Hormad2	-1.85908	0.0276878
Hoxaas2	0.561177	0.0153737				Nup214	-0.270979	0.0276882
B4gat1	0.721901	0.0154975				Synpo2l	-0.684144	0.0276896
Rps13	0.950785	0.0155247				4930540M03Rik	-2.88645	0.0277468
Hist2h4	1.20127	0.0155548				Nes	-0.421929	0.0278697
Madcam1	0.730792	0.0155655				Dusp27	-0.749291	0.0279365
Adamts5	0.600504	0.0156357				Gm773	-4.43187	0.0279883
Bcl3	0.485896	0.0156516				Rsph1	-0.743358	0.0280119
Lingo3	1.07352	0.0156707				Slc2a12	-0.487581	0.028051
Ano4	0.388165	0.0157191				Gm9774	-0.857619	0.0280954
Ints6l	0.371369	0.0158599				Lcp2	-0.516833	0.0281137
Atp5l-ps1	2.71324	0.015875				Tex16	-0.669551	0.0281628
Smtnl2	0.379965	0.0159244				Gm18649	-0.800055	0.0282087
Dtx3	0.638183	0.0159273				Entpd7	-0.368662	0.0282209
Cox6b2	0.514142	0.0160578				Klkb1	-2.0522	0.0282651
Gm37092	2.61402	0.0160871				Clec10a	-0.908425	0.0282669
Gm11110	0.754826	0.0160883				Sstr3	-0.671261	0.0283833
Bdkrb2	0.863487	0.0161189				Gm25144	-6.0835	0.0285028
Uba7	0.471981	0.0162709				Ucma	-6.0835	0.0285028
Pacrg	0.568254	0.0162757				Gm14004	-3.13996	0.0285216
Trim46	0.719863	0.0163644				Hsf2bp	-2.22919	0.0285238
Rsad1	0.582342	0.0164142				Gm10357	-0.606205	0.0285496
Mamdc2	0.896653	0.0164413				Spi1	-0.534753	0.0286241
Unc45b	0.520354	0.0165187				Saal1	-0.333348	0.0286446
Gm15122	0.843761	0.0166232				Fcna	-1.05854	0.0286864
Clk4	0.622279	0.0166497				Xlr	-1.06519	0.0286927
Gng7	0.579456	0.0167307				Batf3	-0.366484	0.0287124
Gm16172	0.835872	0.016749				Dyrk3	-0.275872	0.0287573
Aldoc	1.87374	0.0167912				Ank1	-0.557154	0.0288829
Mif	0.592174	0.0168438				Col4a4	-0.891275	0.0288967
Parp3	0.591415	0.0169106				Utp14b	-0.486172	0.0290199
Gm15674	1.15129	0.0169249				Krt39	-1.2591	0.0290317
Gm38065	3.68078	0.0169757				Slc38a1	-0.261908	0.0291422
Trpm5	0.665333	0.016983				Krt9	-2.14559	0.0293294
Nefm	0.637324	0.0169831				Dsp	-0.372114	0.0293579
Atoh7	2.89164	0.016998				Sybu	-1.42798	0.0295095
Cish	0.569034	0.0170477				Gm15726	-0.814851	0.0295516
Tmem35b	0.400003	0.0170701				Gemin5	-0.233209	0.0295628
9230020A06Rik	1.71406	0.0171466				Gm9873	-2.18686	0.0295851
Gm12678	2.1363	0.0171486				Dnajc3	-0.370339	0.0296822
Ano9	0.487239	0.017172				Gm48014	-2.30762	0.029759
C1s1	0.6713	0.0171865				Stk38l	-0.383249	0.029779
Pcdh15	0.874838	0.0172036				Gm32849	-2.6648	0.0297796
Cdc42ep3	0.311823	0.0172625				Diras2	-0.566798	0.0298079
Car9	1.20664	0.0172955				A2ml1	-0.993647	0.0299367
Abcc10	0.527755	0.01749				Fam222b	-0.34765	0.0299402
Ccdc141	0.791784	0.0175277				L1td1	-0.917177	0.0299771
Olfm3	1.94335	0.017583				Gm1943	-0.428793	0.0299967
A330074K22Rik	1.07695	0.0176822				Foxo6	-1.03697	0.0300402
Cd247	1.00835	0.0177977				Pou4f1	-1.17297	0.0300577
5830454E08Rik	0.599019	0.0178708				Abcg3	-0.668891	0.0301933
Gm44698	1.69741	0.0179536				Myl7	-0.932183	0.0302312
Clcf1	0.397975	0.018038				Otx1	-2.9216	0.0303077
H2-Q5	0.855091	0.0180428				Cebpe	-2.30516	0.0304486
Gm32817	1.28876	0.0181074				Btnl2	-2.25182	0.0304915
1810026B05Rik	0.58529	0.0181219				Ap1s2	-0.28483	0.0305129
Rdm1	0.546519	0.0181434				8030451A03Rik	-3.08942	0.0306028
Ankrd55	1.74138	0.0182016				Pramef8	-0.293458	0.0307157
Tmtc1	0.842921	0.0182653				Prkar2b	-0.848122	0.0308419
Pnrc1	0.502215	0.0182834				Zfp568	-0.273278	0.0310812
Selenbp2	0.935196	0.0183012				Ooep	-0.879476	0.0312566
Cebpd	0.591906	0.0183069				Fam129a	-0.53113	0.0314474
Ripk4	0.394845	0.0183175				B230110C06Rik	-1.83065	0.0315487
4933439C10Rik	0.451701	0.01848				Arl11	-1.19681	0.0315926
6530413G14Rik	1.7032	0.0185499				Psma8	-0.909812	0.0316135
Vill	0.397306	0.0185766				Serpine2	-0.452961	0.0316278
Gm44220	0.932821	0.018613				Gm5067	-2.12244	0.031648
Gm20342	0.581395	0.018614				Gm1141	-1.64329	0.0316585
Gm14091	0.739131	0.0186467				Xpot	-0.278561	0.031807
Hist1h3h	0.682852	0.0187301				Nlrc4	-0.835836	0.0319332
F420014N23Rik	0.638917	0.0188043				Nav2	-0.405337	0.0319599
Rsph9	0.489857	0.018878				Slfn8	-0.735146	0.032022
Cort	0.771807	0.0189311				Hsd11b2	-0.408634	0.0320797
Syngr1	0.472487	0.0190175				Gm46427	-6.00558	0.0321349
Slc16a11	0.430221	0.0190695				Gm48170	-6.00558	0.0321349
2810410L24Rik	0.338397	0.0190918				Pik3cd	-0.663998	0.0324416
Gm32688	0.973469	0.0191567				Hcfc1	-0.29654	0.0324524
Clec2d	0.427622	0.0193148				Rrp12	-0.546248	0.0327166
Ankrd16	0.474671	0.0193328				Gem	-0.702576	0.0328635
Gm44199	0.632649	0.0193652				Olfr329-ps	-4.08921	0.0330207
Gm7809	1.40359	0.0193701				Pprc1	-0.450572	0.0330222
Unc13a	0.639826	0.0193909				Ddias	-0.315506	0.0330458
Thbs2	0.660983	0.0193911				Zar1	-1.78453	0.0332949
Ybx2	0.589443	0.0194057				Nlrp12	-2.84747	0.0332955
Fam71f2	1.57739	0.0194463				Klrb1a	-4.02418	0.0332994
Plcxd1	1.07555	0.0194803				Rrn3	-0.282126	0.0333169
9330151L19Rik	0.463547	0.0194852				Clec5a	-1.65579	0.0333469
Mir100hg	0.792715	0.0195214				Edem3	-0.347368	0.033464
Gm2573	1.78668	0.0195562				Sptb	-0.807509	0.0336053
Gm10791	0.64731	0.0196206				Clu	-0.754554	0.0336058
Gm12576	0.410619	0.0196648				Trim47	-0.905971	0.033619
Ankzf1	0.599038	0.0196709				Mbnl1	-0.336332	0.0337231
Gm28230	0.610071	0.0197171				Nkrf	-0.48987	0.0337261
Ccna1	0.771902	0.0197353				Bnc1	-2.91805	0.0337745
Gm14267	0.626819	0.0197874				Tmeff2	-0.338068	0.0338759
4930500L23Rik	0.8193	0.019805				Akr1c18	-0.729795	0.0338856
Drd1	1.75992	0.0198195				Aldh3b1	-1.90062	0.0339153
Gm36266	0.578315	0.0198507				Gm34653	-2.33127	0.0340201
Klf14	0.783243	0.0198805				Gm43820	-0.610285	0.034068
Anks1b	0.440873	0.0198827				Strip2	-0.53129	0.0340858
Plod1	0.84441	0.0199368				Gm4781	-5.96498	0.0341823
Wdr54	0.838328	0.0200893				Rhox9	-5.26658	0.034286
Gm43185	1.25506	0.0201393				Il1rl1	-0.76313	0.0343264
B4galnt1	0.614324	0.0202088				Gm43507	-2.28342	0.0344056
Celsr3	0.811245	0.0202094				3830403N18Rik	-1.816	0.0344879
Catsper4	0.93936	0.0203252				AC115752.1	-0.584466	0.0345398
Zfp575	0.400481	0.020377				Sh3tc2	-0.698561	0.0346166
Bnip3l	0.670958	0.0204157				Pptc7	-0.370511	0.0346367
Slc37a4	0.56311	0.0205389				Prkcb	-0.517027	0.0346624
Gm47676	1.67493	0.0205788				Gm49769	-0.625176	0.034673
Rxfp3	0.597157	0.0207515				Mns1	-0.442405	0.0347949
Cox17	0.547304	0.0207766				Pzp	-1.09598	0.0348441
Slc9a5	0.607236	0.0207942				Trps1	-0.385993	0.0348495
Gm12758	1.0645	0.0208201				Gm32687	-0.610974	0.0350219
Gm18860	6.44335	0.0208693				Dok7	-1.10506	0.0350885
2510002D24Rik	0.282959	0.02087				Plk3	-0.613132	0.0351039
Igfbp1	0.64051	0.0210265				Fancm	-0.288214	0.0351218
Phactr1	0.635487	0.0210606				Gm11529	-1.69915	0.0351297
Rsl1	0.484004	0.0211003				F630028O10Rik	-1.03851	0.0351916
Shh	0.418668	0.0211606				Foxs1	-0.961683	0.0352437
Mthfs	0.388119	0.0212055				Zmym1	-0.338625	0.0353898
Grik1	0.537367	0.021213				Ankrd52	-0.291128	0.0354002
Ppox	0.497638	0.0212742				Rasd1	-1.0603	0.0354354
Gm48865	0.883273	0.0212822				Lrrc25	-0.703437	0.0354593
C1qtnf4	0.661779	0.0212987				D030028A08Rik	-0.391578	0.0357456
Plppr3	0.639002	0.0213435				Rnf19b	-0.341783	0.0357476
Tmem102	0.412722	0.0215281				Krt24	-2.3648	0.0358127
Slc22a21	0.444344	0.0215291				Kcna7	-1.78914	0.0359015
Rnf208	0.445621	0.0217382				9630013A20Rik	-3.15038	0.0360238
Nefl	0.595153	0.0217855				Reep3	-0.291917	0.0361193
Gstt2	0.423975	0.021803				Limk1	-0.341889	0.0361868
Efna3	0.855904	0.0218064				Ctss	-0.575213	0.0362856
Grpr	1.05093	0.0219183				Aqp12	-5.9232	0.0363996
Slc26a10	0.784346	0.021945				Fut7	-2.92776	0.0365614
Ppp1r15a	0.476113	0.0219777				Fscn2	-0.693235	0.0366131
Cblc	0.48907	0.0219895				Ern2	-2.80338	0.0366189
Cfap69	0.426616	0.0220011				Urb1	-0.3061	0.0366444
Selenbp1	0.69582	0.0220053				Mmp15	-0.316532	0.0366603
Tnfsf13b	0.449765	0.0222377				Prlr	-1.69681	0.0367206
Bnip3l-ps	0.688653	0.0222761				Gm6579	-2.46683	0.0369043
Ccng2	0.743809	0.0224582				Pitpnm2	-0.375062	0.0369172
Cd300lg	1.11514	0.022466				3110045C21Rik	-0.411152	0.0370985
Gm5415	1.6012	0.0224736				Mapk6	-0.236466	0.037109
Ebf1	0.501412	0.0225812				AU020206	-0.737955	0.0371881
Guf1	0.425403	0.0225954				Gm8934	-1.12021	0.0373903
Pcsk9	0.540745	0.0226742				Krt222	-1.48219	0.037405
9030625G05Rik	0.575821	0.0226748				Gm50321	-0.718465	0.0374073
Tap1	0.454522	0.0227946				Fam13b	-0.289716	0.0374988
Gm43980	0.727585	0.022869				Gm47475	-4.74934	0.0376089
Gm43012	0.947417	0.0228794				Gm17981	-2.2971	0.0378703
Npr3	0.410122	0.0230277				Gm5463	-4.38928	0.0378852
Podnl1	1.17086	0.0230745				Gm1627	-1.50909	0.0379023
Galk1	0.568231	0.0230871				Card11	-0.987963	0.0379776
4930526A20Rik	0.410131	0.0230953				Pou2f3	-1.65463	0.0380921
Irf9	0.37626	0.0231222				Abce1	-0.345374	0.0381499
Nmrk1	0.465459	0.0232371				Gm45714	-0.68114	0.038175
Vwa1	1.03761	0.0233195				Gtf2e1	-0.272655	0.0383121
Thap3	0.459124	0.0234873				Sowahd	-4.73377	0.0383665
Ilvbl	0.333035	0.023489				Abca12	-2.54743	0.038404
Asic4	0.771764	0.0235258				Sergef	-0.306892	0.0385009
Gm28913	1.19923	0.0235408				Pmis2	-2.4968	0.038655
Lgals3bp	0.558944	0.0235927				Shtn1	-0.670052	0.0387274
Snhg11	1.00328	0.023632				Gm30794	-3.11403	0.038781
Tmprss11e	2.98636	0.0236558				Gm16270	-5.88018	0.0388044
Gm49759	1.74661	0.0237282				Clec12b	-2.46833	0.0390104
Dio3os	0.805956	0.0237611				Cenpj	-0.422475	0.0391373
Prdm6	0.850098	0.023778				Enpp6	-2.14706	0.0392249
Lmntd2	0.656162	0.0237919				Peg12	-0.417808	0.0392995
Adssl1	0.428464	0.0237969				Myrfl	-1.05658	0.0393226
Gm47147	0.98261	0.0238023				Tulp4	-0.273708	0.0394233
Gm9918	0.928989	0.0239696				Nfatc3	-0.244154	0.0394446
Gm26826	0.915465	0.0239765				Ncl	-0.259377	0.0395177
2500002B13Rik	0.992523	0.0240999				Nr5a2	-0.519587	0.039664
Gm15510	0.575955	0.0241756				Ralgapb	-0.39057	0.0396818
Maff	0.922731	0.0242609				1110002J07Rik	-0.962339	0.0398004
Smad6	0.413209	0.0243245				Clspn	-0.289623	0.0398035
Gm11732	3.50346	0.0243783				Ank	-0.489104	0.0398236
Phlda2	0.586717	0.0243803				Minar2	-0.446475	0.0400158
Flrt1	0.50864	0.0245156				Hspa4	-0.385986	0.0400218
Gabrg2	3.14687	0.0245972				Gm10131	-1.00277	0.0401971
Tbr1	1.15642	0.0246097				Gm30262	-2.79548	0.0402473
Zc3h6	0.769767	0.0246284				Tcfl5	-1.20719	0.0403714
Clcn6	0.623198	0.0246478				9930038B18Rik	-1.56713	0.0404293
Tenm2	0.63364	0.0247591				Klhl11	-0.302432	0.040432
Gm37309	0.621038	0.0247832				Tarsl2	-0.336373	0.0404717
Tcf15	0.378623	0.0248144				AA414768	-0.764699	0.0406099
Gm30893	3.52623	0.0248467				Trim62	-0.469489	0.0406166
Luzp2	0.845255	0.0248745				Hspa12a	-0.373156	0.040653
Gm43618	0.762246	0.0249141				Rab31	-0.242516	0.0407947
1700023H06Rik	1.40232	0.0249487				Gm13052	-4.05694	0.0408319
Cnnm1	1.10876	0.0249886				Gm37285	-0.88781	0.0409752
Frs3	0.36201	0.02503				BC043934	-0.509144	0.0409993
Htr3b	2.9529	0.0251103				Prss30	-1.64236	0.0412043
Mroh1	0.50798	0.025128				Mbnl3	-0.391451	0.0413582
Rsrp1	0.369174	0.0251798				Fignl1	-0.290664	0.0413904
Gm11611	0.682681	0.0252355				Taf7l2	-5.83583	0.0414169
Gm10800	0.694861	0.0252446				Rbm27	-0.287929	0.04147
Gm7517	2.17508	0.0252921				Gm16211	-1.28621	0.0416534
Zfp36	0.476906	0.0253098				Dock4	-0.33633	0.0417484
Cbln3	1.09066	0.0253269				St3gal5	-0.430772	0.0418047
Gm45809	1.67826	0.0254253				Tsr1	-0.354006	0.042027
Hook2	0.38149	0.0254972				Serpinb1b	-3.36578	0.0421256
Zfp703	0.652751	0.0255584				Gm13238	-2.39492	0.0421522
Bbof1	0.847228	0.0255597				Chil1	-0.96988	0.0421542
Lsamp	0.521541	0.0255729				Exo1	-0.304236	0.0421623
Kdm3a	0.91917	0.0255739				Gm44416	-2.00567	0.0421663
4930422M22Rik	0.972402	0.0257891				mt-Nd4	-0.495309	0.0421822
Nyap1	0.64103	0.0257929				Hsp90aa1	-0.333571	0.0423263
Gm37652	1.11828	0.0258359				Shcbp1l	-1.42135	0.0424011
Ifitm3	0.444629	0.025935				Fam222a	-0.482457	0.0424084
Pdk4	0.50343	0.025969				Tex12	-7.93015	0.0424844
Matn2	0.623054	0.0260702				Dnase1l3	-0.876785	0.042548
Gm25259	1.90703	0.0261006				Rfwd3	-0.270508	0.0425972
A930006K02Rik	0.521172	0.0261396				Ccr7	-1.18762	0.0426071
Zbtb7b	0.370272	0.0262201				Eps15	-0.28386	0.0427635
Cyp46a1	0.502639	0.0264908				5830462O15Rik	-3.34663	0.0428133
Dlg2	0.796988	0.0265118				Hs3st3a1	-0.464008	0.0430684
Pla2g7	0.380691	0.0265292				Cherp	-0.285491	0.0430905
Fam135b	1.31807	0.0265375				H2-M10.2	-1.66536	0.0431282
Adgrg5	1.70035	0.0265956				Gm44816	-2.12627	0.0431548
Gm45847	2.50009	0.0267251				9930111J21Rik1	-1.63487	0.0431704
Mpst	0.314773	0.0268109				P2rx7	-0.450234	0.0431917
Rab39	1.60987	0.0268673				Sct	-0.581563	0.0432231
Kcnd2	0.752189	0.0271283				Lrrc4	-0.262662	0.0432529
Gm32884	1.80974	0.0272011				Rin1	-0.454119	0.0432799
Fgd2	0.42652	0.0273659				Gm4740	-1.15139	0.0434255
Crebrf	0.735966	0.0274194				Gm11837	-0.603658	0.0434304
Hexb	0.568274	0.0274351				Siglech	-2.15496	0.0435601
Wdr45	0.356266	0.0274557				Gm10654	-0.940439	0.043593
Aqp8	3.23662	0.0276218				Ccn4	-0.378895	0.0436116
Gm37583	2.05096	0.0276347				Mtmr7	-0.416578	0.0436893
Cdkn1b	0.532604	0.0276929				mt-Cytb	-0.54925	0.0437412
Mpp2	0.843484	0.0278043				Fam49a	-0.305639	0.0438013
Slc35g2	0.442593	0.0279974				Uchl1	-0.394375	0.0438324
Uckl1	0.345989	0.0282581				Tigar	-0.661841	0.0438482
Cldn3	0.453061	0.0282913				Gm6852	-3.14828	0.044069
Rnf39	1.36255	0.0283403				Hmgb1-ps1	-0.430793	0.0441178
Pnck	0.305671	0.0284702				Casc4	-0.263828	0.0441488
Inafm1	0.332595	0.0285128				Lbx1	-1.01045	0.044157
Sost	0.751023	0.0285183				Adamtsl2	-1.24617	0.0441809
Dynlt1c	0.364173	0.0285432				Gm5868	-1.88169	0.0442234
Plekhn1	0.426533	0.028575				Treml1	-0.814446	0.0442846
Ntrk2	0.932859	0.0286247				Fcer1g	-0.477343	0.0443625
Zfp57	0.691999	0.0286782				Saa2	-1.56445	0.0444748
Isoc2b	0.680771	0.0287934				Orc1	-0.397772	0.0445109
Kcnj8	0.586837	0.0288308				Gm12346	-0.566444	0.0445156
Fos	1.16355	0.0288328				Lef1	-0.272718	0.044655
Gm45204	2.63691	0.0288531				Myh7	-1.22297	0.0447155
Ly6h	0.641951	0.0288558				Tesmin	-0.902097	0.0449874
Gm4149	0.345447	0.0288949				Nol8	-0.424212	0.0452634
Hoxd13	0.781253	0.0290837				Supt16	-0.220557	0.0453018
Renbp	0.522065	0.0291257				Dhx9	-0.353353	0.0454441
Rxfp1	1.94	0.0291302				Lrtm1	-2.70491	0.04555
Phyhip	0.643272	0.0291438				Gm20457	-0.377431	0.045616
Cacnb1	0.422187	0.0292563				Coro1a	-0.336019	0.0456526
Ccdc65	0.703502	0.0293446				mt-Nd6	-0.636035	0.0457725
Cyp4f17	0.716553	0.0293938				Endod1	-0.504129	0.0460954
Ghdc	0.533126	0.0294274				Bche	-0.340059	0.0462751
Kbtbd11	0.87223	0.0294356				Gm34471	-2.22375	0.046358
Vegfa	1.41823	0.0294628				Gm37069	-1.99547	0.0464219
Gm27535	1.87151	0.029499				2610035D17Rik	-0.343007	0.0465323
Pdk1	1.62836	0.0296634				Laptm5	-0.492611	0.0465574
C130050O18Rik	0.861888	0.0298214				Btn1a1	-1.51331	0.0469411
Slc16a3	2.16465	0.0298367				Cry1	-0.446361	0.0469617
E030026E10Rik	1.91604	0.0298737				Pdlim1	-0.318762	0.047007
Fbxo27	0.590742	0.0299311				Cdk5rap1	-0.383375	0.0470706
Epha5	0.908646	0.0300616				Frem3	-0.509416	0.0471199
Plekha2	0.849892	0.0302173				Nup62	-0.264803	0.0471742
Fez1	0.819926	0.0302387				Zfp518b	-0.314594	0.0471768
Il12rb1	1.04641	0.0303831				Gm43119	-2.1855	0.0472296
Rabac1	0.29281	0.0304133				Plxdc1	-1.86246	0.0473612
Oas1b	1.0488	0.030607				Kpnb1	-0.227945	0.0475348
Gm9869	0.95105	0.030662				Tmem184c	-0.236141	0.0475384
Vps37d	0.453359	0.0306652				Lynx1	-0.428213	0.0478627
Gm29100	0.628858	0.0307152				Muc16	-3.21596	0.0481081
Gm47950	0.750128	0.0307165				Hspd1	-0.321795	0.0481809
H2-Q2	1.77857	0.0307281				Acer3	-0.357374	0.0481891
Gpr157	0.791484	0.030733				Lair1	-0.723641	0.0483442
Prtn3	0.546885	0.0307969				Mug2	-3.93257	0.0484307
Vmn1r84	3.70613	0.0308132				Pon3	-0.418179	0.0485341
Rln1	3.59008	0.0308529				Spink4	-1.45877	0.0485698
Arhgap8	0.434891	0.0309383				Ctsg	-2.39378	0.0486286
Rac3	0.428429	0.0309612				Fzd9	-0.719647	0.0487472
Mmp9	0.437718	0.0309896				C030005K06Rik	-1.30914	0.0488913
Haghl	0.275636	0.0310026				Ccl6	-0.800573	0.0491581
Snap25	0.997745	0.031023				Pip4k2a	-0.295997	0.0492179
Mab21l3	0.771176	0.031181				Myoz2	-2.42765	0.0492543
Muc1	0.596389	0.0313787				2410002F23Rik	-0.237173	0.0496104
Saxo2	0.471603	0.0313858				Abcc8	-0.430236	0.04968
Vegfb	0.448794	0.0313976
Tnk1	0.41974	0.0314572
Gm15902	3.12858	0.0315264
Kif17	0.674831	0.0315317
Cyp4f13	0.468987	0.0315827
Gm33195	0.421204	0.031643
Efemp1	0.564853	0.0316951
Gm48226	0.264293	0.0317686
Hdac9	0.435018	0.0317839
Klf6	0.313115	0.0318038
Stx1b	0.449203	0.0318486
4931422A03Rik	0.763065	0.031921
Ccrl2	0.595944	0.0319534
Pcdha5	1.64624	0.0319939
Nicn1	0.461617	0.0320449
3110053B16Rik	0.87811	0.0320878
Gm47540	2.77993	0.0320901
Rhpn2	0.387616	0.0321287
Gm45570	1.99517	0.0321364
Dcdc2b	0.903211	0.0322915
Artn	0.577718	0.0323226
Gm41192	1.07909	0.0323349
Slc7a14	1.1692	0.0323474
Gjd2	2.96	0.0324117
Cntnap4	1.19953	0.0324943
Pak7	0.567223	0.0325344
Gm18632	3.60848	0.0325513
Cbarp	0.331712	0.0325745
Gm21738	0.672178	0.0326655
Gm14964	0.530811	0.0327177
Gadd45b	0.488856	0.0327503
Pax1	2.39852	0.0327678
F630040K05Rik	1.3961	0.0329429
Gm31898	1.37502	0.0330532
Cfh	0.409206	0.0331024
Shpk	0.626748	0.0331299
Nyap2	1.83996	0.0332039
Zbtb4	0.427737	0.0332572
E430014B02Rik	2.78532	0.0332862
Scnn1g	0.490239	0.0333947
Fibin	0.408272	0.0334351
Ankrd53	0.667255	0.0334655
Dact1	0.680106	0.0335486
Sptbn4	0.58721	0.0335539
Gtpbp2	0.477721	0.0336694
Gm45124	2.62276	0.0336695
Gm32618	0.368248	0.0336746
B130024G19Rik	0.399309	0.0336989
Alx4	0.932967	0.0338103
Asap3	0.504465	0.0339773
Gm43375	0.685206	0.0342136
Gm22442	1.08596	0.0342149
Il11ra1	0.373301	0.0342781
Morn3	1.33245	0.0343128
Gm26947	1.35773	0.0343545
1700012D14Rik	0.509568	0.0343681
Ankra2	0.330102	0.0343964
Gm50230	1.59527	0.0344432
Gm42614	2.56061	0.0344676
Gm28119	0.795023	0.03447
Cracr2b	0.345159	0.0344929
Gm1840	1.58706	0.0346533
Eif4a2	0.503236	0.0346719
Snhg17	0.430143	0.0347591
Tmem74b	1.37091	0.0348113
Fgf8	0.328739	0.0348812
Efna1	0.389728	0.0350011
Awat2	0.641686	0.0350798
Ece2	0.614465	0.0352464
Ncan	0.812738	0.0352584
Gm16838	1.87949	0.0352868
Rps14	0.259045	0.0354918
Olfm2	0.676032	0.0355542
Coro2a	0.382057	0.0355775
Gm35339	0.626196	0.035635
Gm43080	0.858674	0.0356902
Zdhhc1	0.360889	0.0357926
Fgfbp3	0.346322	0.0358494
Pim3	0.422574	0.0359249
B330016D10Rik	0.392454	0.035969
Kdelr1	0.274825	0.0360175
Drc1	1.05799	0.0360549
Lctl	1.96795	0.0360691
Pcdhb12	1.02633	0.0362311
Adamts1	0.386711	0.0362435
Stat4	0.784955	0.0362821
Adra2c	0.571433	0.0363247
Mlxipl	0.339634	0.0364195
Hoxd12	0.50567	0.036436
Rsph4a	1.08881	0.0365549
Tap2	0.564472	0.0365781
Cdh15	1.01291	0.0365877
Dlg4	0.706769	0.0365955
Zscan2	0.44978	0.0366208
Sat1	0.278032	0.036643
Gm43923	1.2483	0.0368372
Gm45201	3.05566	0.0369425
Mettl7a2	2.80659	0.0369449
Laptm4b	0.336601	0.0369964
Dhrs3	0.636269	0.037161
Narf	0.472758	0.037199
Ctsf	0.438173	0.0372474
Ucn2	1.63712	0.037258
Ripor3	0.571239	0.0373531
Crebl2	0.436837	0.0376132
Rxrg	0.41664	0.0376452
1700018A23Rik	1.45777	0.0376668
Rsph10b	0.597677	0.037725
Ccdc158	0.574085	0.03789
Gm43489	1.2452	0.0379013
D730003I15Rik	0.48779	0.0379088
Vsig2	0.52615	0.037952
Lox	0.550997	0.0379815
Gm18095	1.16709	0.0380008
Gm12472	2.72464	0.03804
Zap70	1.17244	0.0381414
Adcy6	0.276968	0.0381608
H2-T10	1.01337	0.0381744
Gm36948	0.833382	0.0383143
Rarg	0.650312	0.0383481
Mapk1ip1	0.504447	0.0383898
Gm6277	0.621138	0.0384907
Wwox	0.427057	0.038668
Ppfia4	0.604382	0.0386924
Ap1g2	0.262324	0.0389452
Mir205hg	1.25023	0.03896
Sema6b	0.640494	0.0389614
Diras1	1.51548	0.0389823
Ido1	2.81586	0.0391251
Rassf1	0.306656	0.0391342
Gm16230	2.34248	0.0391942
Ypel4	0.419425	0.0392287
Upk3bl	0.882565	0.0392708
Magef1	0.337924	0.0392977
Socs3	0.386904	0.0393193
2810403D21Rik	0.47681	0.0393509
AU022754	0.789344	0.0395294
Cdh10	1.07163	0.0395435
Rrnad1	0.462336	0.039747
Mme	0.375612	0.0397953
Gm128	0.628194	0.0400664
Ptx3	0.255972	0.0400786
Sned1	0.653984	0.0401811
4930412O13Rik	0.404471	0.0401918
Gm47414	1.04146	0.040245
Fam83f	0.448448	0.0402918
Dlk2	0.816725	0.0403768
1700124L16Rik	1.0155	0.0405279
Ppp1r3c	1.75213	0.0405846
Gm49396	0.470294	0.0406787
Gm38190	0.728296	0.0406926
1700001C19Rik	1.82336	0.0407273
Amy1	0.833464	0.0407394
Gm44954	0.719999	0.0408435
Gm49395	1.06398	0.0409013
Rec8	0.243667	0.0409167
Gm14418	0.484179	0.0409289
AW549877	0.37323	0.0409435
Ano3	0.56667	0.0410239
Hdac11	0.389544	0.0411512
Dkk2	0.842792	0.0412809
Gbp6	1.3804	0.0413261
Hey1	0.441333	0.0414034
Pfkp	1.4644	0.0414421
Ccdc106	0.351985	0.0415037
Tppp	0.796012	0.0415603
Prickle3	0.36655	0.0415669
Gm37584	0.718113	0.0415892
Vmn2r76	1.69734	0.0417396
Gm28424	0.521576	0.0417628
0610043K17Rik	1.14311	0.0417832
Hoxa11os	0.363948	0.0418779
Kcnv1	1.5789	0.0419017
Acp6	0.378354	0.0419469
Dnaic2	0.823324	0.0419735
Fam98c	0.522739	0.0419809
B3gnt7	0.530293	0.0420517
1700016J18Rik	2.27378	0.0420918
Gm15501	0.800687	0.042109
Sfxn4	0.554642	0.0421379
Rgs1	2.72023	0.0422934
Izumo4	0.536214	0.0423292
Gm44789	1.72286	0.0423721
Dlx3	1.16857	0.0424159
Mast3	0.496249	0.0424661
2310002F09Rik	0.736449	0.0424963
Gm12454	0.888707	0.0427341
Pfkfb2	0.338678	0.0430102
Malat1	0.624082	0.0432185
Gm3809	2.40352	0.0432282
Albfm1	1.14082	0.0432855
Grp	1.43679	0.0433022
Taz	0.363102	0.0433573
Lpin1	0.820185	0.0434091
Shb	0.364418	0.0434256
Gm47994	1.64144	0.0434594
Jmjd6	0.725592	0.0434839
Gm15956	1.18334	0.0434892
Smok2a	1.59295	0.0437452
Sez6l	0.599075	0.0437963
Hebp1	0.394627	0.0439198
P4ha1	1.61676	0.0441431
Fbxw9	0.247062	0.0441584
Kcnt2	0.532993	0.044192
Sema3f	0.284998	0.0442159
Bbs5	0.328469	0.0442887
Tomm6os	0.600406	0.0442898
Slc27a5	1.32031	0.0443119
Dgat2	0.71177	0.0444288
Gm49041	0.919569	0.0444398
Tmem196	0.992028	0.0445652
Lrrc63	2.06026	0.0446627
Cldn8	0.420956	0.0446689
Mapre3	0.394412	0.0446698
Ppp1r3b	0.744543	0.0447215
Klhdc1	0.49343	0.0448759
Nuggc	1.31089	0.044889
Ak4	1.37505	0.0450081
Grina	0.460873	0.0451206
Hps1	0.340891	0.0451229
Capn11	2.79528	0.0451578
Slc4a3	0.436404	0.0451718
Lgals9	0.636625	0.0452044
Rcan2	0.437826	0.0452125
Hist3h2ba	0.43403	0.0452527
Primpol	0.598682	0.0452606
Tmem139	0.527556	0.0454119
Cdh13	0.700963	0.0454534
Nek8	0.272453	0.045543
Mir5125	0.6642	0.0456428
Gm36839	0.719416	0.045692
Gm31805	0.790912	0.0458006
Bmp4	0.315459	0.046005
4731419I09Rik	0.708688	0.0460316
Acss3	0.545514	0.0461068
Nprl2	0.319895	0.0461328
Lrfn2	0.750739	0.0461636
Rwdd3	0.422758	0.0462074
Ch25h	0.837091	0.0462783
Fam241b	0.354633	0.0463773
Sbk2	1.10146	0.0464554
Ift88os	1.32826	0.0465542
Zfp783	0.248019	0.0466362
Spag8	0.523207	0.0466453
Hgf	0.776105	0.0466986
Kcnk2	0.825744	0.0467031
Mtmr11	0.361273	0.0467313
Sh3yl1	0.304322	0.0469901
Pik3ip1	0.801422	0.0470344
Elmo3	0.34055	0.0470903
Pgm1	1.30874	0.0472022
Nog	0.374096	0.047266
Neil1	0.411174	0.0473819
Nampt	0.820936	0.0475084
Atp7b	0.877686	0.0475933
Gm16008	0.505233	0.0476331
Grin1	0.856242	0.0476682
H2-Bl	2.77843	0.0477034
Kmt5c	0.348172	0.0477634
Ccnl2	0.424078	0.0480589
Mxi1	0.718832	0.0481263
Gm27252	1.28094	0.0481625
Ssc5d	0.639238	0.0481814
Gm27194	1.67801	0.0482703
Insyn2b	0.658183	0.0483117
Aifm2	0.482001	0.0484255
Foxd1	0.747559	0.0484313
F730043M19Rik	0.481919	0.0484413
Ndrg1	1.74432	0.0486701
Tbx6	0.780408	0.0487551
Ndrg2	0.507793	0.048822
Akap8l	0.572141	0.0489607
Zfp383	0.588914	0.0490105
Grk3	0.364769	0.0490273
Dnah9	0.951764	0.0490525
Atp6v0b	0.288153	0.0490787
Slc36a2	0.978712	0.0492003
Gm7153	0.47997	0.0492372
Glo1	0.382089	0.0493144
Triqk	0.396099	0.0493375
Gm16794	0.473008	0.0493517
Cdc42ep2	0.535835	0.0493629
Chl1	0.628933	0.0494395
Nxnl1	0.698278	0.0495114
Slc2a1	1.77734	0.0495478
Ulk3	0.522619	0.0496069
Lrrtm4	1.05215	0.0496732
Gm7904	1.82625	0.049709
Clec1b	0.734407	0.0497747
Mcf2l	0.41678	0.0498338
Scrt2	2.28619	0.049888
Scube2	0.657308	0.0499165
5430421F17Rik	2.04524	0.0499328
