# Supplementary material for: Loss of Planar Cell Polarity Effector Fuzzy Causes Renal Hypoplasia by Disrupting Several Signaling Pathways
Source: J Dev Biol. 2021 Dec 23;10(1):1. doi: 10.3390/jdb10010001 (PMC8788523; doi:10.3390/jdb10010001)
Supplement: Supplementary file 1 [file jdb-10-00001-s001.zip › Supplementary File S4.xlsx]

## Sheet: 3 Selected GO terms
Tube Development	FoldChange	logFC	p_value		Cell projection organization	FoldChange	logFC	p_value		Cell motility	FoldChange	logFC	p_value
Tnmd	8.91679	3.15652	0.00761568		Tlx2	13.0683	3.708	1.74715e-09		Cxcl15	55.2389	5.78761	0.000407315
Scg2	5.71005	2.5135	3.54667e-05		Adm	5.65316	2.49906	0.0109134		Dbh	21.4096	4.42019	0.00166846
Adm	5.65316	2.49906	0.0109134		Dlx5	5.41694	2.43748	0.00288984		Sst	7.43987	2.89528	5.1788e-06
Adm2	5.59473	2.48407	0.000102508		Isl1	4.7189	2.23845	6.93745e-06		Scg2	5.71005	2.5135	3.54667e-05
Isl1	4.7189	2.23845	6.93745e-06		Phox2b	4.57161	2.1927	0.00120419		2610528A11Rik	5.43709	2.44284	0.00305822
Rxfp1	3.83707	1.94	0.0291302		Tnr	4.32549	2.11286	0.00679909		Ackr2	5.04659	2.33531	0.000161702
Esm1	2.74611	1.45739	0.0015247		Stmn4	4.03267	2.01174	0.00956475		Scrt2	4.87767	2.28619	0.049888
Vegfa	2.67257	1.41823	0.0294628		Nyap2	3.58001	1.83996	0.0332039		Isl1	4.7189	2.23845	6.93745e-06
Pgk1	2.38412	1.25346	0.000486384		Stmn3	3.42224	1.77494	0.000172781		Phox2b	4.57161	2.1927	0.00120419
Adora2a	2.31262	1.20953	0.00117323		Vegfa	2.67257	1.41823	0.0294628		Aire	4.45161	2.15433	7.83878e-07
Apold1	2.26978	1.18255	0.00447155		Adora2a	2.31262	1.20953	0.00117323		Tnr	4.32549	2.11286	0.00679909
Edn1	2.12702	1.08883	0.00406774		Tbr1	2.22903	1.15642	0.0246097		Itgbl1	3.41946	1.77377	0.00629869
Flt1	2.02258	1.01619	0.0108938		Rsph4a	2.12699	1.08881	0.0365549		Drd1	3.3868	1.75992	0.0198195
Alx4	1.9092	0.932967	0.0338103		Atcay	2.12418	1.08691	0.00300916		Cxcl13	3.18682	1.67212	5.61036e-05
Ntrk2	1.90905	0.932859	0.0286247		Drc1	2.08203	1.05799	0.0360549		Celf3	2.75258	1.46079	0.000324324
Avpr1a	1.88485	0.914452	0.00263367		Snap25	1.99688	0.997745	0.031023		Vegfa	2.67257	1.41823	0.0294628
Junb	1.84225	0.88147	0.001696		Vldlr	1.98947	0.992382	0.0101528		Tnfaip3	2.63717	1.39899	0.00213165
Efna3	1.80989	0.855904	0.0218064		Unc5d	1.98275	0.987505	0.0137118		Cnr2	2.34799	1.23143	0.00391053
Hoxd13	1.71862	0.781253	0.0290837		Gfra3	1.94944	0.963059	0.00908003		Pde4b	2.33952	1.22621	0.00165645
Tbx6	1.71762	0.780408	0.0487551		Sema4g	1.94429	0.959246	0.00524667		Aldoa	2.28799	1.19408	0.00164536
Hgf	1.7125	0.776105	0.0466986		Ntrk2	1.90905	0.932859	0.0286247		Sbk2	2.14571	1.10146	0.0464554
Foxd1	1.67895	0.747559	0.0484313		Cfap54	1.8928	0.920521	0.00802816		Edn1	2.12702	1.08883	0.00406774
Jmjd6	1.65358	0.725592	0.0434839		Myo16	1.88759	0.916545	0.00578533		Trpm4	2.10151	1.07143	1.60354e-07
Pkm	1.62794	0.703048	0.0140138		Epha5	1.87728	0.908646	0.0300616		Drc1	2.08203	1.05799	0.0360549
Cdh13	1.62559	0.700963	0.0454534		Myo3b	1.87506	0.906935	0.000428114		Flt1	2.02258	1.01619	0.0108938
Dact1	1.60226	0.680106	0.0335486		Pcdh15	1.8338	0.874838	0.0172036		Unc5d	1.98275	0.987505	0.0137118
Hlx	1.59529	0.673817	0.0076843		Ache	1.83237	0.873709	0.00702182		Gfra3	1.94944	0.963059	0.00908003
Thbs2	1.58116	0.660983	0.0193911		Grin1	1.81032	0.856242	0.0476682		Sema4g	1.94429	0.959246	0.00524667
Rarg	1.56951	0.650312	0.0383481		Efna3	1.80989	0.855904	0.0218064		Gpi1	1.91889	0.940271	0.00644974
Cav1	1.48273	0.568258	0.0140787		Eps8l1	1.77419	0.827163	0.00868925		Catsper4	1.91768	0.93936	0.0203252
Lox	1.4651	0.550997	0.0379815		Dnaic2	1.76948	0.823324	0.0419735		Ntrk2	1.90905	0.932859	0.0286247
Dll4	1.45625	0.542255	0.00757419		Lpin1	1.76563	0.820185	0.0434091		Cfap54	1.8928	0.920521	0.00802816
Ramp3	1.42342	0.509363	0.0133896		Fez1	1.76532	0.819926	0.0302387		Grin1	1.81032	0.856242	0.0476682
F3	1.36796	0.452023	0.00928824		Celsr3	1.75472	0.811245	0.0202094		Ch25h	1.78644	0.837091	0.0462783
Vegfb	1.3649	0.448794	0.0313976		Ccdc141	1.73121	0.791784	0.0175277		Celsr3	1.75472	0.811245	0.0202094
Hey1	1.35786	0.441333	0.0414034		Tbx6	1.71762	0.780408	0.0487551		Ccdc141	1.73121	0.791784	0.0175277
Mmp9	1.35446	0.437718	0.0309896		Hgf	1.7125	0.776105	0.0466986		Hgf	1.7125	0.776105	0.0466986
Hdac9	1.35193	0.435018	0.0317839		Foxd1	1.67895	0.747559	0.0484313		Edn3	1.69534	0.761576	0.0149919
Shh	1.33669	0.418668	0.0211606		Zmynd10	1.65522	0.727027	0.00262733		Madcam1	1.65955	0.730792	0.0155655
Smad6	1.33164	0.413209	0.0243245		B4gat1	1.64935	0.721901	0.0154975		Trim46	1.64703	0.719863	0.0163644
Id1	1.32735	0.408544	0.00300387		Trim46	1.64703	0.719863	0.0163644		Mapk15	1.63086	0.705633	2.24594e-05
Efna1	1.31015	0.389728	0.0350011		Syt3	1.63643	0.71055	0.000639322		Ccdc65	1.62845	0.703502	0.0293446
Adamts1	1.30741	0.386711	0.0362435		Dlg4	1.63214	0.706769	0.0365955		Cdh13	1.62559	0.700963	0.0454534
Nog	1.29603	0.374096	0.047266		Mapk15	1.63086	0.705633	2.24594e-05		Icam1	1.58758	0.666834	0.011441
Shb	1.28736	0.364418	0.0434256		Ccdc65	1.62845	0.703502	0.0293446		Zfp703	1.57216	0.652751	0.0255584
Fgf8	1.25591	0.328739	0.0348812		Cdh13	1.62559	0.700963	0.0454534		Sema6b	1.55886	0.640494	0.0389614
Ptn	1.25109	0.323181	0.00951305		Cntn4	1.62521	0.700622	2.2981e-06		Lgals9	1.55469	0.636625	0.0452044
Bmp4	1.24441	0.315459	0.046005		H2-K1	1.61614	0.692554	0.00485774		Phactr1	1.55346	0.635487	0.0210606
Rec8	1.184	0.243667	0.0409167		Dact1	1.60226	0.680106	0.0335486		Chl1	1.54642	0.628933	0.0494395
Nfatc3	0.844311	-0.244154	0.0394446		Kif17	1.59641	0.674831	0.0315317		Matn2	1.54013	0.623054	0.0260702
Ncl	0.835448	-0.259377	0.0395177		Icam1	1.58758	0.666834	0.011441		Ccrl2	1.51146	0.595944	0.0319534
Lef1	0.827759	-0.272718	0.044655		Gfap	1.5858	0.665208	0.0138596		Mif	1.50752	0.592174	0.0168438
E2f8	0.81571	-0.293871	0.0126491		Ccdc13	1.5829	0.66257	0.0141052		Phlda2	1.50183	0.586717	0.0243803
Naa15	0.81206	-0.300343	0.0231376		Nyap1	1.55944	0.64103	0.0257929		Artn	1.49249	0.577718	0.0323226
Emc10	0.795287	-0.330452	0.0144331		Sema6b	1.55886	0.640494	0.0389614		Hexb	1.48275	0.568274	0.0274351
Syk	0.770573	-0.375997	0.0162798		Unc13a	1.55814	0.639826	0.0193909		Cav1	1.48273	0.568258	0.0140787
Dicer1	0.760688	-0.394624	0.0154532		Nefm	1.55544	0.637324	0.0169831		Pak7	1.48167	0.567223	0.0325344
Abcc8	0.74214	-0.430236	0.04968		Phactr1	1.55346	0.635487	0.0210606		Efemp1	1.47924	0.564853	0.0316951
Serpine2	0.730542	-0.452961	0.0316278		Tenm2	1.55147	0.63364	0.0247591		Slc37a4	1.47745	0.56311	0.0205389
Tcf7	0.725065	-0.463818	0.0111551		Chl1	1.54642	0.628933	0.0494395		Lox	1.4651	0.550997	0.0379815
Mylk	0.717241	-0.479471	0.0272633		Matn2	1.54013	0.623054	0.0260702		Prtn3	1.46093	0.546885	0.0307969
Prkcb	0.69881	-0.517027	0.0346624		Lrrc4b	1.53602	0.619199	0.0148812		Dll4	1.45625	0.542255	0.00757419
Spi1	0.690277	-0.534753	0.0286241		Nefl	1.51063	0.595153	0.0217855		Asap3	1.4186	0.504465	0.0339773
Ppp1r16b	0.688973	-0.537482	0.0146999		Mif	1.50752	0.592174	0.0168438		Scnn1g	1.40468	0.490239	0.0333947
Cyp1b1	0.6802	-0.555969	0.00380833		Sptbn4	1.50234	0.58721	0.0335539		Rsph9	1.40431	0.489857	0.018878
Tigar	0.632071	-0.661841	0.0438482		Artn	1.49249	0.577718	0.0323226		Adgrg3	1.38252	0.467302	0.0128191
Heyl	0.622408	-0.684069	0.0042201		Cav1	1.48273	0.568258	0.0140787		F3	1.36796	0.452023	0.00928824
Itgb2	0.589045	-0.763551	0.00335833		Efemp1	1.47924	0.564853	0.0316951		Vegfb	1.3649	0.448794	0.0313976
Gli1	0.57719	-0.792882	0.00602063		Ccdc114	1.4669	0.552768	0.00803323		Mmp9	1.35446	0.437718	0.0309896
Col4a4	0.539137	-0.891275	0.0288967		Cdc42ep2	1.44978	0.535835	0.0493629		Hdac9	1.35193	0.435018	0.0317839
Il18	0.516585	-0.952922	0.0140685		Neu1	1.44874	0.5348	0.00648903		Rac3	1.34577	0.428429	0.0309612
Cx3cr1	0.513807	-0.960703	0.000162587		Flrt1	1.42271	0.50864	0.0245156		Cfap69	1.34408	0.426616	0.0220011
Chil1	0.510548	-0.96988	0.0421542		Rsph9	1.40431	0.489857	0.018878		Shh	1.33669	0.418668	0.0211606
Lbx1	0.496391	-1.01045	0.044157		Hey1	1.35786	0.441333	0.0414034		Tmem102	1.33119	0.412722	0.0215281
Sox8	0.495827	-1.01209	0.0021675		Rac3	1.34577	0.428429	0.0309612		Efna1	1.31015	0.389728	0.0350011
Myocd	0.479968	-1.05899	3.95173e-05		Shh	1.33669	0.418668	0.0211606		Adamts1	1.30741	0.386711	0.0362435
Wnt2b	0.42499	-1.2345	0.00125131		Id1	1.32735	0.408544	0.00300387		Pla2g7	1.30197	0.380691	0.0265292
Adamtsl2	0.421565	-1.24617	0.0441809		Hoxa2	1.31974	0.400258	0.0103141		Nog	1.29603	0.374096	0.047266
Fuz	0.414637	-1.27008	1.88919e-06		Efna1	1.31015	0.389728	0.0350011		Elmo3	1.26624	0.34055	0.0470903
Ascl1	0.371139	-1.42997	5.17764e-05		Adamts1	1.30741	0.386711	0.0362435		Fgf8	1.25591	0.328739	0.0348812
Hesx1	0.36395	-1.45819	0.0170683		Nog	1.29603	0.374096	0.047266		Ptn	1.25109	0.323181	0.00951305
Ccr2	0.348438	-1.52103	1.35456e-06		Sgk1	1.27189	0.346978	0.0130984		Bmp4	1.24441	0.315459	0.046005
Plxdc1	0.275006	-1.86246	0.0473612		Fgf8	1.25591	0.328739	0.0348812		Sema3f	1.21841	0.284998	0.0442159
Nodal	0.266566	-1.90743	0.0110328		Bbs5	1.25568	0.328469	0.0442887		Nup62	0.832312	-0.264803	0.0471742
Apob	0.191161	-2.38714	0.000105357		Ptn	1.25109	0.323181	0.00951305		Lef1	0.827759	-0.272718	0.044655
Abca12	0.171059	-2.54743	0.038404		Bmp4	1.24441	0.315459	0.046005		Plaa	0.824621	-0.278197	0.0249998
Hrg	0.0873702	-3.51671	0.00703753		Cdc42ep3	1.24128	0.311823	0.0172625		Elmo1	0.795726	-0.329657	0.0159819
Plg	0.0545676	-4.19581	0.00161064		Sh3yl1	1.23484	0.304322	0.0469901		Emc10	0.795287	-0.330452	0.0144331
Edn2	0.0499487	-4.32341	0.00134867		Sema3f	1.21841	0.284998	0.0442159		Hsp90aa1	0.79357	-0.333571	0.0423263
					Adcy6	1.21165	0.276968	0.0381608		Coro1a	0.792224	-0.336019	0.0456526
					Nek8	1.20786	0.272453	0.045543		Dock4	0.792054	-0.33633	0.0417484
					Mapk6	0.848822	-0.236466	0.037109		Tmeff2	0.7911	-0.338068	0.0338759
					Plaa	0.824621	-0.278197	0.0249998		Kitl	0.786372	-0.346716	0.0245371
					Rrn3	0.822378	-0.282126	0.0333169		Plxna1	0.780627	-0.357295	0.0122693
					Map2	0.794987	-0.330998	0.0095071		Syk	0.770573	-0.375997	0.0162798
					Hsp90aa1	0.79357	-0.333571	0.0423263		Macf1	0.763014	-0.390218	0.0242822
					Coro1a	0.792224	-0.336019	0.0456526		Abcc8	0.74214	-0.430236	0.04968
					Ntn3	0.789638	-0.340736	0.0252502		Fcer1g	0.718299	-0.477343	0.0443625
					Limk1	0.789008	-0.341889	0.0361868		Mylk	0.717241	-0.479471	0.0272633
					Plxna1	0.780627	-0.357295	0.0122693		Gas6	0.710026	-0.494056	0.0138487
					Prmt3	0.765848	-0.38487	0.00256943		Dock5	0.709468	-0.495191	0.0022562
					Map1a	0.763757	-0.388815	0.0156288		Cend1	0.704805	-0.504705	0.0110485
					Uchl1	0.760819	-0.394375	0.0438324		Bves	0.700062	-0.514446	0.0164083
					Dicer1	0.760688	-0.394624	0.0154532		Strip2	0.691936	-0.53129	0.0340858
					Nectin1	0.747106	-0.420616	0.00775808		Fermt3	0.683867	-0.548211	0.00155855
					Nes	0.746426	-0.421929	0.0278697		Csf1r	0.680829	-0.554635	0.0260068
					Cenpj	0.746143	-0.422475	0.0391373		Cyp1b1	0.6802	-0.555969	0.00380833
					Mns1	0.735907	-0.442405	0.0347949		Rac2	0.666293	-0.585771	0.00432923
					P2rx7	0.731924	-0.450234	0.0431917		Cmklr1	0.650579	-0.620204	0.000393304
					Serpine2	0.730542	-0.452961	0.0316278		Vav1	0.638759	-0.646655	0.0048201
					Mylk	0.717241	-0.479471	0.0272633		Nckap1l	0.638459	-0.647333	0.000459674
					Ap2a1	0.704399	-0.505535	2.55262e-05		Pik3cd	0.631127	-0.663998	0.0324416
					Csf1r	0.680829	-0.554635	0.0260068		Shtn1	0.628484	-0.670052	0.0387274
					Cspg5	0.673396	-0.570473	0.0109626		Fscn2	0.618465	-0.693235	0.0366131
					Rac2	0.666293	-0.585771	0.00432923		Cntn2	0.613312	-0.705307	0.0255027
					Nckap1l	0.638459	-0.647333	0.000459674		Timp1	0.595814	-0.747065	0.0123733
					Shtn1	0.628484	-0.670052	0.0387274		Itgb2	0.589045	-0.763551	0.00335833
					Cntn2	0.613312	-0.705307	0.0255027		Myo1f	0.580331	-0.785053	0.00358361
					Rsph1	0.597348	-0.743358	0.0280119		Egr1	0.579033	-0.788281	0.0016968
					Clu	0.59273	-0.754554	0.0336058		Lama3	0.578712	-0.789083	0.00581471
					Itpka	0.589033	-0.76358	0.026432		Gli1	0.57719	-0.792882	0.00602063
					Clrn1	0.52434	-0.931426	1.24916e-06		Ccl6	0.574121	-0.800573	0.0491581
					Atp2b2	0.523849	-0.932777	5.5405e-05		P2ry6	0.557677	-0.842497	0.00222236
					Sema7a	0.514759	-0.958032	0.0190877		Clrn1	0.52434	-0.931426	1.24916e-06
					Slitrk2	0.502135	-0.993852	0.0229753		Il18	0.516585	-0.952922	0.0140685
					P2ry12	0.49503	-1.01441	0.01107		Sema7a	0.514759	-0.958032	0.0190877
					Foxo6	0.48735	-1.03697	0.0300402		Cx3cr1	0.513807	-0.960703	0.000162587
					Trpc6	0.476648	-1.069	0.0245477		Sox8	0.495827	-1.01209	0.0021675
					Ptpn5	0.455606	-1.13414	0.0217206		P2ry12	0.49503	-1.01441	0.01107
					Pou4f1	0.443508	-1.17297	0.0300577		Myo1g	0.494401	-1.01625	0.000689673
					Trem2	0.441983	-1.17794	0.000556641		Myocd	0.479968	-1.05899	3.95173e-05
					Ccr7	0.439027	-1.18762	0.0426071		Aoc3	0.477226	-1.06726	0.0154039
					Fuz	0.414637	-1.27008	1.88919e-06		Acta2	0.463651	-1.10889	0.00100502
					Kndc1	0.372312	-1.42542	0.024854		Olfr78	0.451324	-1.14776	0.0234686
					Dnaic1	0.348476	-1.52087	0.00991991		Bin2	0.445716	-1.1658	0.00248241
					Actn2	0.337174	-1.56843	0.00627776		Pou4f1	0.443508	-1.17297	0.0300577
					Plppr4	0.31652	-1.65963	0.00603615		Trem2	0.441983	-1.17794	0.000556641
					Myoc	0.204379	-2.29068	0.0189813		Ccr7	0.439027	-1.18762	0.0426071
					Lrtm1	0.153371	-2.70491	0.04555		Fuz	0.414637	-1.27008	1.88919e-06
					Adcyap1	0.0462059	-4.43578	0.00325048		Ascl1	0.371139	-1.42997	5.17764e-05
										Dnaic1	0.348476	-1.52087	0.00991991
										Ccr2	0.348438	-1.52103	1.35456e-06
										Ccr1	0.342879	-1.54423	5.39001e-11
										Saa2	0.338107	-1.56445	0.0444748
										Slc9b1	0.32224	-1.63379	0.00561913
										Retn	0.293196	-1.77006	0.015217
										Nodal	0.266566	-1.90743	0.0110328
										Rhox5	0.223109	-2.16418	0.00237308
										Myoc	0.204379	-2.29068	0.0189813
										Acan	0.198212	-2.33488	2.70958e-05
										Apob	0.191161	-2.38714	0.000105357
										Lefty1	0.189546	-2.39938	0.00107386
										Nlrp12	0.13894	-2.84747	0.0332955
										Fut7	0.131418	-2.92776	0.0365614
										Hrg	0.0873702	-3.51671	0.00703753
										Saa1	0.0821225	-3.60608	1.30625e-10
										Plg	0.0545676	-4.19581	0.00161064
										Edn2	0.0499487	-4.32341	0.00134867
										Ccl17	0.0288968	-5.11295	0.00587084
