# Supplementary material for: Loss of Planar Cell Polarity Effector Fuzzy Causes Renal Hypoplasia by Disrupting Several Signaling Pathways
Source: J Dev Biol. 2021 Dec 23;10(1):1. doi: 10.3390/jdb10010001 (PMC8788523; doi:10.3390/jdb10010001)
Supplement: Supplementary file 1 [file jdb-10-00001-s001.zip › Supplementary File S6.xlsx]

## Sheet: Sheet1
Primer List
PrimerBank ID	primer_name		primer_sequence
6678563a1	mus-Vegfa	Forward	GCACATAGAGAGAATGAGCTTCC
		Reverse	CTCCGCTCTGAACAAGGCT
31981762a1	mus-Gfra3	Forward	AGAGAACAGGTTTGTGAACAGC
		Reverse	CAGCGGCCTGCTTAAACTG
125719164c1	mus-Celsr3	Forward	CAGTGGAGCCGTAGCTCTTTG
		Reverse	CGTTTTGCCTACCTACTCGGA
170172521c2	mus-Hgf	Forward	AACAGGGGCTTTACGTTCACT
		Reverse	CGTCCCTTTATAGCTGCCTCC
6679837a1	mus-Foxd1	Forward	CTTCTCCATCGAGAGCCTCAT
		Reverse	CTGTCCCTTGGTGCAGAGTC
299758492c1	mus-Dact1	Forward	GAAGAGATGCCGGTTTGTTGA
		Reverse	GCCCGAAGCTCCATCACTC
	mus-Shh	Forward	CCCAATTACAACCCCGACATCATA
		Reverse	GTTCATCACAGAGATGGCCAAG
158187522c1	mus-Nog	Forward	GCCAGCACTATCTACACATCC
		Reverse	GCGTCTCGTTCAGATCCTTCTC
732821a1	mus-Fgf8	Forward	AGGGGAAGCTAATTGCCAAGA
		Reverse	CCTTGCGGGTAAAGGCCAT
6680796a1	mus-Bmp4	Forward	TTCCTGGTAACCGAATGCTGA
		Reverse	CCTGAATCTCGGCGACTTTTT
118130133c1	mus-Lef1	Forward	GCCACCGATGAGATGATCCC
		Reverse	TTGATGTCGGCTAAGTCGCC
226958526c2	mus-Sox8	Forward	AGCGAGAAGAGGCCGTTTG
		Reverse	CGCCTTGGCTGGTATTTGTAAT
	mus-Gli1	Forward	GTCTGCGTGGTAGAGGGAAC
		Reverse	GGAGACAGCATGGCTCACTA
6671509a1	mus-Actb	Forward	GGCTGTATTCCCCTCCATCG
		Reverse	CCAGTTGGTAACAATGCCATGT
PrimerBank Reference:
https://pga.mgh.harvard.edu/primerbank/citation.html
1. Athanasia Spandidos, Xiaowei Wang, Huajun Wang and Brian Seed: PrimerBank: a resource of human and mouse PCR primer pairs for gene expression detection and quantification. Nucl. Acids Res. 2010 38:D792-9.
2. Athanasia Spandidos, Xiaowei Wang, Huajun Wang, Stefan Dragnev, Tara Thurber and Brian Seed: A comprehensive collection of experimentally validated primers for Polymerase Chain Reaction quantitation of murine transcript abundance. BMC Genomics 2008, 9:633
3. Xiaowei Wang and Brian Seed: A PCR primer bank for quantitative gene expression analysis. Nucleic Acids Research 2003 31(24): e154; pp.1-8.
